# Supplementary material for: An investigation into detector dead time variability and mass dependency in quadrupole ICP-MS and implications for isotope ratio accuracy
Source: Royal Society of Chemistry journal article supplement (doi:10.1039/d5ja00398a), 2026-01-01
Supplement: d5ja00398a1.xlsx [file d5ja00398a1.xlsx]

## Sheet: Supplementary Table 1
	Section 3: Deadtime effect on isotope ratios over a range of z									Section 4: Investigating dead time variation over time with mass shifted Sr isotope tandem Q-ICP-MS/MS data									Section 5: variable V - Extract 2, Plate defect and Plate bias
experiment	Li_30min	Sr_30min	Ce_30min	Pb_30min	U_30min	Sr_30min_MS/MS	Ce_30min_MS/MS	U_30min_MS/MS		201104 Sr O2	210716 Sr O2	220811 Sr	220907 Sr	220928 Sr	230707 - 8mm	230707 - 6mm	220811		250130 Extract 2 experiment	250130 Plate defect experiment	250130 Plate bias experiment
notes	Li 10 μg/ml in 2% HNO3 - Cat# 10 29-1 Lot# 1226118	NIST SRM (NBS) 987	Ce 10 μg/ml in 2% HNO3 - Cat# 10 11-1 Lot# 1132622	NIST SRM (NBS) 982	U 10 μg/ml in 2% HNO3 - Cat# 10 64-1 Lot# 1233812	NIST SRM (NBS) 987	Ce 10 μg/ml in 2% HNO3 - Cat# 10 11-1 Lot# 1132622	U 10 μg/ml in 2% HNO3 - Cat# 10 64-1 Lot# 1233812
reaction gas	none	none	none	none	none	N2O	N2O	N2O		O2	O2	N2O	N2O	N2O	N2O	N2O	N2O		O2	O2	O2
tau for analysis (ns)	0	0	0	0	0	0	0	0		0	41.5	41.5	41.5	41.5	0	0	0		0	0	0
tau applied for correction (ns)	33	36.8	36	38	40.8	36.7	36	36.5		45.53	38.15	38.55	44.75	46.1	34.4	35.55	36.45		36.65	37.1	36.5
std	1.4	1.6	0.8	1.5	2.7	0.7	0.05	1		1.38132	0.781009	0.7	0.793511	0.5	0.8	1.31918	0.998459		0.19	0.14	0.17
RF Power (Watts)	1550	1550	1550	1550	1550	1550	1550	1550		1550	1550	1550	1550	1550	1550	1550	1500		1550	1550	1550
RF Maching (Volts)	1.3	1.3	1.3	1.3	1.3	1.3	1.3	1.3		1.2	1.2	1.2	1.2	1.2	1.3	1.3	1.2		1.2	1.2	1.2
Sample Dept (mm)	8	8	8	8	8	8	8	8		8	8	8	8	8	8	6	8.1		8	8	8
Neb Gas (L/min)	0.65	0.65	0.65	0.65	0.65	0.64	0.64	0.64		0.6	0.6	0.6	0.6	0.6	0.64	0.64	0.62		0.6	0.6	0.6
Make up Gas (L/min)	0.52	0.52	0.52	0.52	0.52	0.51	0.51	0.51		0.58	0.57	0.57	0.57	0.57	0.51	0.51	0.53		0.57	0.57	0.57
Extract 1 (Volts)	4.5	4.5	4.5	4.5	4.5	5.1	5.1	5.1		5.1	5.5	5.5	5.5	5.5	5.1	5.1	4.9		5.5	5.5	5.5
Extract 2 (Volts)	-75	-75	-75	-75	-75	-116.5	-116.5	-116.5		-240	-240	-240	-200	-175	-102	-102	-70		variable	-200	-200
Omega Biase ( Volts)	-200	-200	-200	-200	-200	-200	-200	-200		-195	-195	-195	-195	-195	-200	-200	-200		-195	-195	-195
Omega Lense (Volts)	14.2	14.2	14.2	14.2	14.2	11.4	11.4	11.4		14.2	9.2	11.9	5.5	5.5	11.4	11.4	16.4		5.5	5.5	5.5
Q1 Entrence (Volts)	-5	-5	-5	-5	-5	1	1	1		0.5	2	1.5	3	3	1	1	-5		3	3	3
Q1 Exit (Volts)	1	1	1	1	1	1	1	1		1.4	1.6	1.6	0.6	0.6	1	1	1		0.6	0.6	0.6
Cell Focus (Volts)	-1	-1	-1	-1	-1	2.4	2.4	2.4		1.3	2.4	2.2	2.2	2.8	2.4	2.4	5		2.2	2.2	2.2
Cell Entrence (Volts)	-42	-42	-42	-42	-42	-60	-60	-60		-50	-60	-70	-80	-81	-60	-60	-60		-80	-80	-80
Cell Exit (Volts)	-60	-60	-60	-60	-60	-85	-85	-85		-60	-85	-85	-81	-70	-85	-85	-85		-81	-81	-81
Deflect (Volts)	14.2	14.2	14.2	14.2	14.2	-4.6	-4.6	-4.6		-2.3	-4.1	-4.1	-4.1	-4.1	-4.6	-4.6	-3.6		-4.1	variable	-4.1
Plate Biase (Volts)	-40	-40	-40	-40	-40	-53	-53	-53		-50	-50	-55	-55	-55	-53	-53	-53		-55	-55	variable
Q 1 Bias (Volts)	-9	-9	-9	-9	-9	0.4	0.4	0.4		0.2	0.6	0.6	0.6	0.6	0.4	0.4	-1		0.6	0.6	0.6
Q1 Prefilter Biase (Volts)	-5.5	-5.5	-5.5	-5.5	-5.5	-9	-9	-9		-8.4	-9	-9.1	-9	-6.6	-9	-9	-8.5		-9	-9	-9
Q1 post Filter Biase (Volts)	-9	-9	-9	-9	-9	-5	-5	-5		-3	-3.3	-3.3	-3.3	-3.3	-5	-5	-10		-3.3	-3.3	-3.3
He Flow										0.5
4th gas flow %						28	28	28		27	27	27	27	27	28	28	28		27	27	27
Oct Biase (Volts)	-8	-8	-8	-8	-8	-12	-12	-12		-10	-12	-12	-12	-12	-12	-12	-12		-12	-12	-12
Axial Acceleration (Volts)	0	0	0	0	0	1.6	1.6	1.6		1	1.6	1.6	1.7	1.7	16	16	1.6		1.7	1.7	1.7
Oct RF (Volts)	170	170	170	170	170	122	122	122		130	130	180	180	173	176	176	180		180	180	180
Energy Discrimination (Volts)	5	5	5	5	5	-6	-6	-6		-6	-6	-6	-6	-8	-6	-6	-6		-6	-6	-6
Target element - Mass Q1 - Mass Q2 - dwell time
Li - 6	0.01
Li - 7	0.01
Kr - 83		0.01
Sr - 84		0.01								0.1	0.1	0.1	0.05	0.05
Rb - 85										0.1	0.1	0.1	0.05	0.05
Sr - 86		0.01								0.1	0.1	0.1	0.05	0.05
Sr - 87		0.01								0.1	0.1	0.1	0.05	0.05
Sr - 88		0.01
Ce - 136			0.01
Ce - 138			0.01
Ce - 140			0.01
Ce - 142			0.01
Tl - 203				0.01
Pb - 204				0.01
Pb - 206				0.01
Pb - 207				0.01
Pb - 208				0.01
U - 235					0.01
U - 238					0.01
Kr - 83 - 99						0.05				0.05	0.05	0.05	0.01	0.01	0.05	0.05	0.05		0.05	0.05	0.05
Sr - 84 - 100						1				1	1	1	1	1	1	1	1		1	1	1
Rb - 85 - 101										0.1	0.1	0.1	0.05	0.05	0.1	0.1	0.1		0.1	0.1	0.1
Sr - 86 - 102						0.1				0.8	0.8	0.8	0.8	0.8	0.8	0.8	0.8		0.8	0.8	0.8
Sr - 87 - 103						1				1	1	1	1	1	1	1	1		1	1	1
Sr - 88 - 104						0.1				0.1	0.1	0.1	0.1	0.1	0.1	0.1	0.1		0.1	0.1	0.1
Ce - 136 -152							0.1
Ce - 138 - 154							0.1
Ce - 140 - 156							0.1
Ce - 142 - 158							0.1
U - 235 - 251								0.1
U - 238 - 254								0.1

## Sheet: Supplementary Table 2
Reference Material concentration blocks	Experiment time	86Sr16O τ = 0	2SE	87Sr16O τ = 0	2SE	88Sr16O τ = 0	2SE	calculated individual τ	88Sr16O τ = 0 / 86Sr16O τ = 0				86Sr16O session specific τ	2SE	87Sr16O session specific τ	2SE	88Sr16O session specific τ	2SE		88Sr16O/ 86Sr16O τ corrected		average τ corrected for each RM concentration block					τ and Mass Bias Corrected			τ, Mass Bias and externally Corrected
																						88Sr16O τ = 0	%std	88Sr16O/ 86Sr16O τ corrected	%std		88Sr/ 86Sr	2SE		88Sr/ 86Sr	2SE
Experiment 201104 - O2											4.553e-08
NIST SRM 987 5ppb	2020-11-04 12:29:25	25477.4	86.5551	18441.2	47.2423	218861	901.545	2.1385e-08	8.59039		Session Specific τ		25507	86.5661	18456.7	47.2624	221064	901.546		8.66678							0.711478	0.00188287		0.710613	0.00188057
NIST SRM 987 5ppb	2020-11-04 13:45:49	25860.1	63.4845	18686.3	43.3849	220911	697.728	4.9574e-08	8.54256		(ns)		25890.6	63.4996	18702.2	43.4069	223156	697.73		8.6192							0.712009	0.00151389		0.711167	0.0015121
NIST SRM 987 5ppb	2020-11-04 15:02:37	26540.5	105.172	19183.7	83.0491	226379	986.107	5.59032e-08	8.52957		45.53		26572.6	105.181	19200.5	83.0605	228736	986.108		8.60798							0.713563	0.00157989		0.712743	0.00157808
NIST SRM 987 5ppb	2020-11-04 16:19:18	27213.7	49.1716	19612.9	46.5267	231478	694.365	6.80697e-08	8.50592		1.38132		27247.5	49.191	19630.4	46.5472	233943	694.366		8.58587							0.711326	0.00162297		0.710532	0.00162117
NIST SRM 987 5ppb	2020-11-04 17:35:57	27635.8	59.7624	19921.2	49.1364	236235	666.104	4.32489e-08	8.54816				27670.6	59.7784	19939.2	49.1558	238804	666.105		8.63023							0.709677	0.00176409		0.708909	0.0017622
NIST SRM 987 5ppb	2020-11-04 18:52:31	27938	57.8631	20199.1	44.0301	238157	702.79	5.59247e-08	8.52451				27973.5	57.8796	20217.7	44.0518	240768	702.791		8.60699		228670	3.48093	8.61951	0.318623		0.712955	0.00199782		0.712206	0.00199572
NIST SRM 987 10ppb	2020-11-04 12:40:26	52005.9	303.396	37533	224.929	442099	2783.38	3.71166e-08	8.50094				52129.3	303.4	37597.3	224.933	451181	2783.38		8.65503							0.709423	0.00150744		0.708565	0.00150562
NIST SRM 987 10ppb	2020-11-04 13:56:59	52135.9	149.589	37670.3	116.597	442598	1610.91	4.05197e-08	8.48931				52260	149.596	37735	116.605	451701	1610.91		8.64334							0.710421	0.00116859		0.709585	0.00116721
NIST SRM 987 10ppb	2020-11-04 15:13:48	53598.8	147.705	38651.5	105.295	452964	2016.15	5.06827e-08	8.451				53729.9	147.712	38719.6	105.304	462502	2016.15		8.6079							0.711046	0.00136624		0.710232	0.0013647
NIST SRM 987 10ppb	2020-11-04 16:30:21	54626.2	164.663	39386.7	114.152	462352	1737.88	4.59869e-08	8.46393				54762.4	164.669	39457.4	114.16	472295	1737.88		8.62443							0.710174	0.0014366		0.709384	0.00143499
NIST SRM 987 10ppb	2020-11-04 17:46:57	55464.7	103.961	40021.8	69.7958	467969	1335.12	5.29133e-08	8.43724				55605.1	103.971	40094.8	69.8094	478157	1335.12		8.59916							0.711535	0.00138226		0.710768	0.00138076
NIST SRM 987 10ppb	2020-11-04 19:03:34	55513.7	101.585	40127.9	72.5339	469059	1123.22	4.93874e-08	8.44942				55654.4	101.594	40201.4	72.547	479295	1123.22		8.61198		456173	2.6597	8.62364	0.251762		0.712261	0.00108336		0.711517	0.00108222
NIST SRM 987 15ppb	2020-11-04 12:50:43	77734.8	404.408	56191.5	317.112	654549	4001.11	4.1227e-08	8.42029				78010.9	404.41	56335.7	317.115	674655	4001.11		8.64822							0.710324	0.00137626		0.709467	0.00137459
NIST SRM 987 15ppb	2020-11-04 14:07:29	77102.7	229.779	55840.9	181.764	649603	2539.11	4.0557e-08	8.42516				77374.3	229.783	55983.3	181.77	669401	2539.11		8.65146							0.711885	0.00145597		0.71105	0.00145427
NIST SRM 987 15ppb	2020-11-04 15:24:02	79603.4	148.145	57553.2	92.299	668382	1657.19	4.50604e-08	8.3964				79893	148.152	57704.4	92.3094	689361	1657.19		8.62855							0.711516	0.000954296		0.710705	0.000953202
NIST SRM 987 15ppb	2020-11-04 16:40:43	81129.6	243.354	58552.6	170.132	681863	2379.62	4.25916e-08	8.4046				81430.4	243.358	58709.1	170.138	703709	2379.62		8.64185							0.710509	0.00110197		0.709722	0.00110074
NIST SRM 987 15ppb	2020-11-04 17:57:18	82041	179.592	59378.1	133.447	689522	2053.51	4.21188e-08	8.4046				82348.6	179.597	59539	133.454	711871	2053.51		8.6446							0.710978	0.00107339		0.710215	0.00107223
NIST SRM 987 15ppb	2020-11-04 19:13:55	83228.5	164.82	60089	128.928	697092	1994.42	4.7109e-08	8.37564				83545	164.826	60253.9	128.936	719942	1994.43		8.61741		673502	2.84802	8.63868	0.151337		0.711024	0.00134143		0.710284	0.00134003
NIST SRM 1570a	2020-11-04 13:24:14	69217.9	341.727	49940	212.802	584033	3204.07	4.23152e-08	8.43761				69436.7	341.729	50053.8	212.806	599988	3204.07		8.64079							0.710436	0.00137108		0.70959	0.00136944
NIST SRM 1570a	2020-11-04 14:40:51	71039	279.366	51360.3	196.827	599521	2459.75	4.08498e-08	8.43931				71269.6	279.37	51480.6	196.832	616345	2459.75		8.64808							0.710198	0.00135333		0.709376	0.00135178
NIST SRM 1570a	2020-11-04 15:57:28	72654	294.211	52448.7	212.275	612744	2776.23	4.1163e-08	8.43373				72895.1	294.214	52574.3	212.28	630329	2776.23		8.64707							0.709755	0.00123354		0.708956	0.00123216
NIST SRM 1570a	2020-11-04 17:14:12	74139.4	315.932	53460.6	232.374	624147	2949.56	4.3598e-08	8.41856				74390.5	315.935	53591	232.378	642402	2949.56		8.63554							0.709426	0.00166814		0.708651	0.0016663
NIST SRM 1570a	2020-11-04 18:30:45	74869.5	344.513	54116.5	236.879	628873	2860.73	4.7226e-08	8.39959				75125.5	344.516	54250.1	236.883	647410	2860.73		8.6177							0.711267	0.00169589		0.710514	0.00169411
NIST SRM 1570a	2020-11-04 19:47:27	75680.3	214.479	54591.7	161.625	635870	2825.59	4.61972e-08	8.40206				75942	214.484	54727.7	161.631	654828	2825.6		8.62275		614198	3.18337	8.63532	0.146403		0.710214	0.00126951		0.709485	0.00126819
USGS W-2	2020-11-04 13:13:10	99096	389.593	71386	281.02	826479	3602.89	4.53595e-08	8.34019				99545.1	389.596	71618.7	281.023	858795	3602.89		8.6272							0.708606	0.00131311		0.707759	0.00131155
USGS W-2	2020-11-04 14:29:55	101103	350.724	72859.1	232.454	842658	3161.57	4.53542e-08	8.33462				101571	350.727	73101.6	232.458	876277	3161.57		8.62725							0.709148	0.00119317		0.708323	0.00119179
USGS W-2	2020-11-04 15:46:32	103787	316.425	74734.1	224.567	862730	3082.58	4.76563e-08	8.31254				104279	316.428	74989.3	224.571	898003	3082.58		8.61152							0.709149	0.00128877		0.708347	0.00128732
USGS W-2	2020-11-04 17:03:07	105581	284.58	76004.4	219.975	876558	3304.94	4.84461e-08	8.30223				106091	284.583	76268.3	219.98	912996	3304.94		8.60577							0.709165	0.0012211		0.708387	0.00121977
USGS W-2	2020-11-04 18:19:44	107034	315.523	77010.4	223.847	887659	3481.12	4.91714e-08	8.29322				107558	315.526	77281.3	223.851	925044	3481.12		8.60039							0.70878	0.00119612		0.708026	0.00119486
USGS W-2	2020-11-04 19:38:25	107225	317.129	77208	231.834	890505	3185.54	4.72769e-08	8.30502				107751	317.132	77480.4	231.838	928136	3185.54		8.61371		864431	2.96462	8.61431	0.128044		0.709004	0.00170969		0.708274	0.00170791
																						covariance used to calculate τ uncertainty following Iso et al. (1995)	3.02733		0.199234
					slope of the linear intercept of M1 (88Sr16O τ = 0) vs 88Sr16O τ = 0 / 86Sr16O τ = 0	m =	-3.4685e-07									slope of the linear intercept of M1 (88Sr16O τ = 0) vs 88Sr16O/ 86Sr16O τ corrected	m =	2.7264e-11
					intercept of the linear intercept of M1 (88Sr16O τ = 0) vs 88Sr16O τ = 0 / 86Sr16O τ = 0	c =	8.62608									intercept of the linear intercept of M1 (88Sr16O τ = 0) vs 88Sr16O/ 86Sr16O τ corrected	c =	8.62628
Experiment 210716 - O2											3.815e-08
USGS AGV-2	2021-07-16 16:13:29	73577.5	274.807	52897.1	182.514	621146	2156.33	3.60345e-08	8.44205		Session Specific τ		73784.7	274.808	53004.1	182.515	636222	2156.33		8.62269							0.708418	0.00116763		0.705497	0.00116282
USGS AGV-2	2021-07-16 20:58:11	74757.7	199.913	53572.8	152.323	629874	1688.2	3.898e-08	8.42554		(ns)		74971.5	199.914	53682.5	152.324	645382	1688.2		8.60836							0.70678	0.00115175		0.703748	0.00114682
USGS AGV-2	2021-07-17 04:16:01	72823.4	252.839	52254.2	173.385	614918	2206.88	3.59924e-08	8.44396		38.15		73026.3	252.84	52358.5	173.386	629690	2206.88		8.62278							0.706634	0.00118357		0.703708	0.00117872
USGS AGV-2	2021-07-17 07:44:01	72670	130.136	52144.1	94.765	614064	1345.37	3.47414e-08	8.45004		0.614224		72872	130.138	52248	94.767	628795	1345.37		8.62876		620000	1.17738	8.62065	0.100547		0.706548	0.00115239		0.7039	0.00114801
NIST SRM 1570a	2021-07-16 17:08:15	114464	407.618	82746	284.718	954173	3408.93	3.80622e-08	8.33597				114966	407.619	83008	284.719	990218	3408.93		8.6131							0.711947	0.0012805		0.708984	0.00127516
NIST SRM 1570a	2021-07-16 20:47:13	116710	168.677	84430.2	114.286	974512	1947.69	3.53954e-08	8.34986				117232	168.678	84703.1	114.288	1.01214e+06	1947.69		8.63367							0.711875	0.0010076		0.708824	0.00100328
NIST SRM 1570a	2021-07-17 04:05:04	114561	185.565	82716.8	139.631	954086	2335.46	3.91401e-08	8.32817				115064	185.566	82978.7	139.633	990125	2335.46		8.60498							0.711364	0.00100447		0.708409	0.00100028
NIST SRM 1570a	2021-07-17 07:33:04	114760	262.229	82949	225.531	956449	2759.93	3.81938e-08	8.33436				115264	262.23	83212.3	225.532	992670	2759.93		8.61211							0.711563	0.000933335		0.708877	0.000929848
NIST SRM 1570a	2021-07-17 08:27:47	117431	362.05	84809.9	230.231	975091	3227.18	4.16144e-08	8.30354				117959	362.051	85085.2	230.232	1.01277e+06	3227.18		8.58573		962862	1.13641	8.60992	0.200182		0.712092	0.000947064		0.7095	0.000943551
NIST SRM 987 15ppb	2021-07-16 15:40:40	82389.4	348.82	59437.2	268.919	689616	3186.37	4.61425e-08	8.37021				82649.1	348.82	59572.3	268.92	708249	3186.37		8.56935							0.712565	0.00173795		0.709643	0.00173079
NIST SRM 987 15ppb	2021-07-16 15:51:36	83177.3	334.626	60343.5	226.489	702632	3241.33	3.08561e-08	8.4474				83442	334.626	60482.7	226.49	721985	3241.33		8.65253							0.713146	0.00155744		0.710216	0.00155105
NIST SRM 987 15ppb	2021-07-16 16:02:32	83846	379.175	60730.2	251.938	704616	2989.58	3.89189e-08	8.40369				84115.1	379.176	60871.3	251.939	724080	2989.58		8.6082							0.713796	0.00146318		0.710858	0.00145717
NIST SRM 987 15ppb	2021-07-16 16:46:22	81372.3	407.277	58774.2	281.856	683716	3684.83	4.03719e-08	8.40232				81625.7	407.278	58906.3	281.857	702028	3684.83		8.60057							0.712678	0.00163374		0.709723	0.00162697
NIST SRM 987 15ppb	2021-07-16 20:36:16	83705.1	201.211	60633	144.128	704894	1869.05	3.56474e-08	8.42116				83973.2	201.212	60773.6	144.129	724373	1869.05		8.62624							0.713449	0.00125252		0.710394	0.00124714
NIST SRM 987 15ppb	2021-07-17 00:15:11	77062.4	359.756	55814.8	255.965	650532	2704.63	3.44946e-08	8.44162				77289.6	359.757	55933.9	255.966	667087	2704.63		8.631							0.713101	0.00149851		0.710031	0.00149205
NIST SRM 987 15ppb	2021-07-17 03:54:07	77501.6	374.867	56008.2	273.277	650876	3169.88	4.32342e-08	8.39823				77731.4	374.867	56128.1	273.278	667449	3169.88		8.58661							0.713248	0.00103275		0.710275	0.00102844
NIST SRM 987 15ppb	2021-07-17 06:27:23	75202.3	242.514	54448.7	189.563	633270	2230.41	3.97349e-08	8.42089				75418.6	242.515	54562	189.564	648948	2230.41		8.60461							0.713871	0.00105864		0.71107	0.00105455
NIST SRM 987 15ppb	2021-07-17 06:38:19	76898.1	176.185	55700.4	114.171	647243	1639.1	3.96888e-08	8.41689				77124.3	176.186	55819	114.173	663629	1639.1		8.60467							0.713385	0.00108957		0.710602	0.00108529
NIST SRM 987 15ppb	2021-07-17 07:22:06	76733.6	343.775	55553.6	252.196	646901	2887.66	3.69493e-08	8.43048				76958.8	343.776	55671.6	252.196	663270	2887.66		8.6185							0.713053	0.00108037		0.710343	0.00107624
NIST SRM 987 15ppb	2021-07-17 08:05:54	80013.4	389.989	57767.5	273.932	672087	3259.61	4.1586e-08	8.39968				80258.4	389.99	57895.1	273.932	689773	3259.61		8.5944							0.712259	0.00115179		0.709627	0.00114745
NIST SRM 987 15ppb	2021-07-17 08:16:51	81772.9	165.637	59032.3	138.742	686598	1797.18	4.1334e-08	8.3964				82028.8	165.638	59165.5	138.744	705066	1797.18		8.59535		672748	3.85228	8.60767	0.255683		0.712277	0.00108555		0.709665	0.00108158
USGS W-2	2021-07-16 17:19:13	97136.2	283.386	69986.5	198.465	814911	2800.45	3.59613e-08	8.38936				97497.5	283.387	70173.8	198.466	841058	2800.45		8.62645							0.709343	0.00112119		0.706386	0.00111649
USGS W-2	2021-07-17 00:37:06	96683.7	423.533	69793.4	292.008	811520	3466.54	3.54317e-08	8.39356				97041.7	423.533	69979.7	292.008	837447	3466.54		8.62977							0.709906	0.00111241		0.706853	0.00110763
USGS W-2	2021-07-17 07:00:15	96957.9	288.641	69831.3	225.888	811665	3026.95	3.90242e-08	8.37132				97317.8	288.642	70017.8	225.889	837602	3026.95		8.60687		812699	0.235867	8.62103	0.143572		0.709895	0.00114895		0.707161	0.00114459
																						covariance used to calculate τ uncertainty following Iso et al. (1995)	1.60048		0.174996
					slope of the linear intercept of M1 (88Sr16O τ = 0) vs 88Sr16O τ = 0 / 86Sr16O τ = 0	m =	-2.9103e-07									slope of the linear intercept of M1 (88Sr16O τ = 0) vs 88Sr16O/ 86Sr16O τ corrected	m =	-6.68972e-10
					intercept of the linear intercept of M1 (88Sr16O τ = 0) vs 88Sr16O τ = 0 / 86Sr16O τ = 0	c =	8.61244									intercept of the linear intercept of M1 (88Sr16O τ = 0) vs 88Sr16O/ 86Sr16O τ corrected	c =	8.61247
Experiment 220811 - N2O											3.855e-08
USGS AGV-2	2022-08-11 13:37:27	75136.3	1007.93	54209.8	728.053	643102	8119.79	4.01018e-08	8.55915		Session Specific τ		75354.5	1007.93	54323.3	728.053	659451	8119.79		8.75131							0.705612	0.00121444		0.704558	0.00121254
USGS AGV-2	2022-08-11 14:35:41	74666.6	798.007	53944.5	560.47	639985	6616.81	3.7863e-08	8.57123		(ns)		74882.1	798.007	54056.9	560.47	656173	6616.81		8.76275							0.705596	0.00110759		0.704368	0.00110561
USGS AGV-2	2022-08-11 15:24:30	74957.2	688.114	54077.9	479.407	643112	5186.39	3.59776e-08	8.57972		38.55		75174.4	688.114	54190.9	479.408	659461	5186.39		8.77242							0.70514	0.00111824		0.703806	0.00111624
USGS AGV-2	2022-08-11 18:01:17	80199.1	549.313	57764.6	365.456	684318	3842.85	4.26586e-08	8.53275		0.667991		80447.8	549.313	57893.5	365.457	702860	3842.85		8.73685							0.705964	0.00137896		0.704524	0.00137612
USGS AGV-2	2022-08-11 20:38:05	77316.4	774.325	55880.1	503.977	661452	6410.29	3.97737e-08	8.55512				77547.6	774.326	56000.7	503.977	678759	6410.29		8.75281							0.705575	0.00103755		0.704194	0.00103544
USGS AGV-2	2022-08-11 23:14:50	76690.5	623.335	55166.5	542.98	655439	5770.73	4.18239e-08	8.54655				76917.9	623.336	55284.1	542.98	672429	5770.73		8.74217							0.706746	0.00171349		0.705428	0.00170967
USGS AGV-2	2022-08-12 00:03:51	75608	1066.87	54644.5	738.624	647660	8290.28	3.84515e-08	8.56602				75829.1	1066.87	54759.9	738.625	664245	8290.28		8.75976		653581	2.37813	8.75401	0.139262		0.706537	0.0010298		0.705897	0.00102897
NIST SRM 987	2022-08-11 13:18:02	107048	914.967	77988.2	569.163	911019	5945.15	3.52093e-08	8.51037				107492	914.968	78223.4	569.163	944178	5945.15		8.78373							0.710446	0.000985758		0.70948	0.000984654
NIST SRM 987	2022-08-11 13:27:44	106419	1089.65	77388.9	818.561	901629	8910.99	4.10001e-08	8.47242				106858	1089.65	77620.5	818.561	934096	8910.99		8.7415							0.711996	0.00088288		0.710978	0.000881893
NIST SRM 987	2022-08-11 14:16:17	106576	1350.9	77611.2	919.635	906033	10332	3.66965e-08	8.50127				107016	1350.9	77844.1	919.635	938824	10332		8.77276							0.711022	0.00127218		0.709833	0.00127021
NIST SRM 987	2022-08-11 14:25:59	107158	1192.9	78289.4	675.265	911909	7642.82	3.5234e-08	8.50995				107603	1192.9	78526.4	675.265	945135	7642.82		8.78357							0.711793	0.00122554		0.710578	0.00122351
NIST SRM 987	2022-08-11 15:04:58	106910	1123.84	77646.5	838.648	905670	9096.84	4.09664e-08	8.47137				107352	1123.84	77879.7	838.649	938435	9096.84		8.74166		907252	0.46595	8.76464	0.245533		0.711411	0.00106671		0.710109	0.00106491
NIST SRM 987	2022-08-11 17:41:41	94850.8	1092.93	69826.6	399.976	814851	4209.38	2.6632e-08	8.59087				95198.9	1092.93	70015.1	399.977	841278	4209.38		8.83705							0.712116	0.000921423		0.710629	0.000919429
NIST SRM 987	2022-08-11 17:51:29	95124.1	871.157	69043.7	661.01	807523	7220.64	4.31073e-08	8.48915				95474.2	871.157	69228	661.01	833469	7220.64		8.72978							0.711451	0.000887069		0.709982	0.000885166
NIST SRM 987	2022-08-11 20:18:29	93794.7	956.84	68133.8	724.379	797660	8567.01	4.11908e-08	8.50431				94135.1	956.84	68313.2	724.38	822966	8567.01		8.74239							0.711503	0.00136889		0.710165	0.00136652
NIST SRM 987	2022-08-11 20:28:17	93135.5	894.798	67916.1	559.678	792495	6864.37	4.06896e-08	8.50905				93471.1	894.799	68094.4	559.679	817469	6864.37		8.74568							0.711419	0.00100766		0.710057	0.00100567
NIST SRM 987	2022-08-11 22:55:13	91755.3	982.564	66593.6	759.31	781759	7494.43	3.94366e-08	8.52004				92081	982.565	66765	759.31	806051	7494.43		8.75371							0.711746	0.000806088		0.710229	0.000804125
NIST SRM 987	2022-08-11 23:05:02	92221.4	766.056	67358.8	431.453	787879	4716.26	3.53182e-08	8.54334				92550.5	766.056	67534.2	431.453	812559	4716.26		8.77963							0.712547	0.00106682		0.711112	0.00106378
NIST SRM 987	2022-08-11 23:44:15	91081.5	718.653	66104.9	594.906	775028	6305.77	4.15854e-08	8.50918				91402.4	718.653	66273.8	594.906	798897	6305.77		8.74044							0.710811	0.0010481		0.70988	0.0010468
NIST SRM 987	2022-08-11 23:54:03	90329.9	905.082	65903.8	530.102	773938	5890.65	3.1864e-08	8.56791				90645.6	905.082	66071.7	530.103	797739	5890.65		8.80064		791392	1.86725	8.76617	0.420691		0.710819	0.00108774		0.710032	0.00108511
NIST SRM 1570a	2022-08-11 13:47:10	114688	1359.18	83462.3	993.696	971392	11243.5	3.83929e-08	8.46988				115197	1359.18	83731.7	993.696	1.00918e+06	11243.5		8.76048							0.711057	0.00108381		0.709958	0.0010823
NIST SRM 1570a	2022-08-11 14:45:27	115568	943.161	83959.7	667.721	975353	8356.05	4.22366e-08	8.43961				116086	943.161	84232.3	667.722	1.01346e+06	8356.05		8.73026							0.710809	0.00089462		0.70955	0.000893233
NIST SRM 1570a	2022-08-11 15:34:21	114965	985.748	83643.1	647.759	976036	6100.19	3.55765e-08	8.48982				115477	985.748	83913.7	647.76	1.0142e+06	6100.19		8.78265							0.710408	0.00123866		0.709043	0.00123635
NIST SRM 1570a	2022-08-11 18:11:06	121598	1147.45	88321.3	815.824	1.02396e+06	9577.47	4.25917e-08	8.42086				122170	1147.45	88623	815.825	1.06604e+06	9577.47		8.72582							0.711708	0.00125025		0.710276	0.0012475
NIST SRM 1570a	2022-08-11 20:47:53	119946	1175.66	86861.5	1005.76	1.01197e+06	10271.8	4.10537e-08	8.4369				120503	1175.66	87153.3	1005.76	1.05305e+06	10271.8		8.7388							0.710384	0.00130201		0.70896	0.00129949
NIST SRM 1570a	2022-08-11 23:24:38	116945	1468.65	85775	687.249	997329	7342.6	2.98596e-08	8.52819				117475	1468.65	86059.6	687.249	1.03721e+06	7342.6		8.82919							0.710458	0.000982722		0.709254	0.000981293
NIST SRM 1570a	2022-08-12 00:13:40	115777	1312.36	83886	1017.18	974586	12179.6	4.5154e-08	8.4178				116296	1312.36	84158.1	1017.18	1.01263e+06	12179.6		8.70737		990089	2.13577	8.75351	0.270768		0.710461	0.00123463		0.709961	0.00123306
																						covariance used to calculate τ uncertainty following Iso et al. (1995)	1.71177		0.269063
					slope of the linear intercept of M1 (88Sr16O τ = 0) vs 88Sr16O τ = 0 / 86Sr16O τ = 0	m =	-2.98889e-07									slope of the linear intercept of M1 (88Sr16O τ = 0) vs 88Sr16O/ 86Sr16O τ corrected	m =	8.29721e-11
					intercept of the linear intercept of M1 (88Sr16O τ = 0) vs 88Sr16O τ = 0 / 86Sr16O τ = 0	c =	8.75925									intercept of the linear intercept of M1 (88Sr16O τ = 0) vs 88Sr16O/ 86Sr16O τ corrected	c =	8.75938
Experiment 2200907 - N2O											4.475e-08
NIST SRM 1570a	2022-09-07 16:29:03	99341.6	137.56	72174.4	107.853	842795	1518.01	4.6307e-08	8.48381		Session Specific τ		99785.2	137.563	72408.2	107.856	875827	1518.01		8.77713							0.708832	0.000910115		0.708769	0.000910065
NIST SRM 1570a	2022-09-07 17:09:10	99340.2	251.054	72448	186.694	847093	2567.83	3.94967e-08	8.52719		(ns)		99783.8	251.055	72683.7	186.696	880469	2567.83		8.82377							0.709557	0.00104519		0.709531	0.00104515
NIST SRM 1570a	2022-09-07 19:49:10	99753.3	175.075	72503.4	127.15	846350	1964.3	4.60189e-08	8.48443		44.75		100201	175.077	72739.4	127.153	879666	1964.3		8.77905							0.708965	0.00113692		0.70908	0.0011371
NIST SRM 1570a	2022-09-07 22:29:17	101254	127.998	73597	89.5889	859096	1709.47	4.53206e-08	8.48453		0.793511		101715	128	73840.2	89.5924	893444	1709.47		8.78378							0.70855	0.00101227		0.708808	0.00101264
NIST SRM 1570a	2022-09-08 01:09:23	102229	234.947	74336.2	166.713	868450	2379.31	4.32603e-08	8.49517				102699	234.949	74584.3	166.715	903565	2379.31		8.79823							0.70848	0.000949588		0.70888	0.000950087
NIST SRM 1570a	2022-09-08 01:59:27	103724	210.599	75407.4	143.696	880423	2046.11	4.37016e-08	8.48811				104208	210.601	75662.7	143.699	916534	2046.11		8.79523		857368	1.72738	8.79286	0.197663		0.708555	0.000939407		0.709001	0.00093998
NIST SRM 987	2022-09-07 15:38:50	67384.4	208.641	49090.2	153.485	577530	1897.45	4.82629e-08	8.57068				67588.2	208.642	49198.3	153.487	592852	1897.45		8.77153							0.710889	0.000913626		0.710781	0.000913501
NIST SRM 987	2022-09-07 16:08:56	68267.2	233.621	49703.2	166.397	587139	2156.19	4.09296e-08	8.6006				68476.4	233.622	49814	166.398	602982	2156.19		8.80569							0.709368	0.00103815		0.709288	0.00103802
NIST SRM 987	2022-09-07 16:18:56	69587.9	151.044	50640	119.449	596827	1391.35	4.54295e-08	8.57659				69805.2	151.046	50755	119.452	613204	1391.35		8.7845							0.709983	0.00105378		0.709912	0.0010537
NIST SRM 987	2022-09-07 16:59:13	70404.3	175.867	51233	140.987	602542	1804.69	4.88948e-08	8.55831				70626.8	175.869	51350.7	140.989	619239	1804.69		8.76776							0.710646	0.00107891		0.710611	0.00107889
NIST SRM 987	2022-09-07 19:39:20	70150.8	153.368	51127.5	112.922	602114	1519.29	4.36349e-08	8.58314				70371.7	153.37	51244.7	112.925	618787	1519.29		8.79312							0.710592	0.00106979		0.710699	0.00106995
NIST SRM 987	2022-09-07 22:19:16	70817.6	189.059	51526.5	134.531	606604	1887.5	4.69985e-08	8.56572				71042.8	189.061	51645.6	134.534	623530	1887.5		8.77683							0.710062	0.00111252		0.710311	0.00111289
NIST SRM 987	2022-09-08 00:59:22	70598.1	149.858	51411.7	100.886	606282	1438.29	4.23503e-08	8.58779				70821.8	149.86	51530.3	100.889	623189	1438.29		8.79939							0.709749	0.00102189		0.710141	0.00102245
NIST SRM 987	2022-09-08 01:49:25	72148.8	196.892	52518.3	145.681	618750	1947.3	4.39358e-08	8.57604				72382.5	196.893	52642	145.683	636371	1947.3		8.79178		599723	2.1142	8.78633	0.153832		0.709748	0.00107344		0.710185	0.00107409
USGS W-2	2022-09-07 16:39:09	121689	155.147	88169.8	105.162	1.02502e+06	2034.28	4.56589e-08	8.42327				122355	155.149	88519	105.165	1.07429e+06	2034.28		8.78014							0.706499	0.00103447		0.706446	0.00103439
USGS W-2	2022-09-07 17:19:02	121971	176.916	88491	126.761	1.02845e+06	2212.46	4.44244e-08	8.43194				122641	176.918	88842.8	126.763	1.07807e+06	2212.46		8.79048							0.707014	0.00107542		0.706996	0.0010754
USGS W-2	2022-09-07 19:59:11	124099	222.188	89928.2	161.347	1.04513e+06	2362.34	4.49614e-08	8.4218				124792	222.19	90291.5	161.349	1.09641e+06	2362.34		8.78594							0.706445	0.000915364		0.706569	0.00091551
USGS W-2	2022-09-07 22:39:19	125822	190.733	91187.6	135.792	1.05942e+06	2223.99	4.45719e-08	8.42001				126534	190.735	91561.2	135.794	1.11214e+06	2223.99		8.78929							0.706395	0.00104056		0.706662	0.00104101
USGS W-2	2022-09-08 01:19:25	125316	241.394	90877.4	146.227	1.05503e+06	2361.02	4.48819e-08	8.41898				126023	241.395	91248.5	146.229	1.10731e+06	2361.02		8.78661							0.706827	0.000974467		0.707236	0.000975016
USGS W-2	2022-09-08 02:09:28	125911	196.292	91459.6	120.095	1.05865e+06	2256.78	4.60628e-08	8.40798				126624	196.294	91835.5	120.098	1.1113e+06	2256.78		8.77639		1.04528e+06	1.46193	8.78481	0.0622439		0.707695	0.000839483		0.708149	0.000840064
																						covariance used to calculate τ uncertainty following Iso et al. (1995)	1.76784		0.137913
					slope of the linear intercept of M1 (88Sr16O τ = 0) vs 88Sr16O τ = 0 / 86Sr16O τ = 0	m =	-3.48401e-07									slope of the linear intercept of M1 (88Sr16O τ = 0) vs 88Sr16O/ 86Sr16O τ corrected	m =	6.3696e-12
					intercept of the linear intercept of M1 (88Sr16O τ = 0) vs 88Sr16O τ = 0 / 86Sr16O τ = 0	c =	8.78775									intercept of the linear intercept of M1 (88Sr16O τ = 0) vs 88Sr16O/ 86Sr16O τ corrected	c =	8.78783
Experiment 220928 - N2O											4.61e-08
USGS AGV-2	2022-09-28 19:15:02	58353.4	115.295	41944.5	84.5236	498621	1131.62	4.74774e-08	8.54485		Session Specific τ		58510.8	115.297	42025.8	84.5253	510352	1131.62		8.72236							0.70389	0.00130861		0.703818	0.00130853
USGS AGV-2	2022-09-28 19:55:05	59690.1	108.097	42922.3	78.9657	510378	1174.1	4.49625e-08	8.55046		(ns)		59854.8	108.099	43007.4	78.9676	522675	1174.1		8.73239							0.70332	0.00122788		0.703408	0.00122827
USGS AGV-2	2022-09-28 22:35:15	57920.5	109.468	41580.8	83.5449	494450	1250.03	5.00104e-08	8.5367		46.1		58075.6	109.47	41660.7	83.5466	505984	1250.03		8.7125							0.703478	0.0010534		0.704177	0.00105439
USGS AGV-2	2022-09-29 01:15:23	58255.2	105.85	41857	70.2205	497497	1086.75	4.88562e-08	8.53996		0.538523		58412.1	105.851	41937.9	70.2226	509175	1086.75		8.71695							0.703946	0.00116917		0.704639	0.00117025
USGS AGV-2	2022-09-29 02:15:27	58463.5	100.316	42043.2	63.077	500787	1027.25	4.18578e-08	8.5658				58621.5	100.318	42124.8	63.0793	512622	1027.25		8.7446							0.703018	0.00100626		0.703537	0.00100706
USGS AGV-2	2022-09-29 03:05:31	59638.5	98.5189	42872.9	76.7749	509732	1043.71	4.58895e-08	8.54703				59802.9	98.5204	42957.8	76.7768	521998	1043.71		8.72864		501911	1.32185	8.72624	0.132723		0.703787	0.00101771		0.704142	0.00101822
NIST SRM 987	2022-09-28 17:56:05	70463.4	181.826	51172.6	110.505	599927	1679.87	4.61111e-08	8.51402				70693	181.826	51293.6	110.507	616990	1679.87		8.72774							0.711179	0.0021804		0.710783	0.0021791
NIST SRM 987	2022-09-28 18:25:00	71010.2	182.841	51521.9	134.02	604042	1754.61	4.74259e-08	8.50641				71243.4	182.842	51644.5	134.022	621344	1754.61		8.72143							0.710356	0.00107052		0.710083	0.00106994
NIST SRM 987	2022-09-28 18:55:01	71431.4	148.212	51877.2	108.106	608291	1659.04	4.51116e-08	8.51573				71667.4	148.213	52001.6	108.108	625841	1659.04		8.73257							0.710495	0.000986559		0.710343	0.000986492
NIST SRM 987	2022-09-28 19:05:01	73431.3	207.582	53289.4	155.437	624005	1918.79	4.76918e-08	8.49781				73680.7	207.583	53420.7	155.438	642487	1918.79		8.71989							0.710035	0.000980337		0.709922	0.000980249
NIST SRM 987	2022-09-28 19:45:04	70677.4	165.043	51213.2	126.194	601263	1751.1	4.74877e-08	8.50714				70908.5	165.044	51334.4	126.195	618404	1751.1		8.72116							0.710804	0.00110517		0.710851	0.00110538
NIST SRM 987	2022-09-28 22:25:14	71190.8	184.272	51582.4	144.857	606361	1877.19	4.48986e-08	8.51741				71425.2	184.273	51705.4	144.858	623798	1877.19		8.73358							0.709349	0.00105517		0.710028	0.00105618
NIST SRM 987	2022-09-29 01:05:22	71380.2	168.459	51867.6	122.787	609333	1598.65	4.06375e-08	8.53644				71615.9	168.46	51991.9	122.789	626944	1598.65		8.75426							0.709112	0.00123617		0.709832	0.00123746
NIST SRM 987	2022-09-29 02:05:26	73582.9	189.445	53438.1	130.91	626836	1830.95	4.31499e-08	8.51877				73833.4	189.446	53570.1	130.911	645489	1830.95		8.74251		610007	1.65043	8.73164	0.137006		0.709886	0.00100142		0.710442	0.00100215
	2022-09-29 02:55:30																										0.709973	0.00108724		0.710365	0.00108791
USGS W-2		80506.5	171.522	58247	120.286	683203	1854.96	5.66555e-08	8.48631				80806.4	171.522	58403.8	120.287	705420	1854.96		8.72976
USGS W-2	2022-09-28 19:25:03	80506.9	125.994	58202.6	85.3614	681751	1724.28	6.01807e-08	8.46823				80806.8	125.995	58359.2	85.3631	703873	1724.28		8.71056							0.707873	0.00115141		0.707839	0.00115138
USGS W-2	2022-09-28 20:05:07	80241.6	158.505	57945.1	114.219	679860	1813.41	5.95115e-08	8.47266				80539.5	158.505	58100.3	114.22	701857	1813.41		8.71444							0.708215	0.00119616		0.708346	0.00119643
USGS W-2	2022-09-28 22:45:16	80725.4	192.721	58300.6	138.929	685129	1933.46	5.63373e-08	8.48715				81026.9	192.722	58457.7	138.93	707474	1933.46		8.73134							0.707256	0.00114181		0.70798	0.00114288
USGS W-2	2022-09-29 01:25:24	80890.4	178.538	58431.8	112.539	686206	1704.18	5.69967e-08	8.48316				81193.2	178.539	58589.6	112.54	708623	1704.18		8.72761							0.706528	0.00114927		0.707198	0.00115043
USGS W-2	2022-09-29 02:25:28	81275.9	116.408	58685.8	73.0353	689741	1365.37	5.60966e-08	8.48642				81581.5	116.41	58845	73.0373	712393	1365.37		8.73229		684315	0.511851	8.72433	0.107534		0.706561	0.00111164		0.70705	0.0011124
	2022-09-29 03:15:32																										0.706235	0.00109466		0.706559	0.00109517
																						covariance used to calculate τ uncertainty following Iso et al. (1995)	1.16137		0.125754
					slope of the linear intercept of M1 (88Sr16O τ = 0) vs 88Sr16O τ = 0 / 86Sr16O τ = 0	m =	-3.56192e-07									slope of the linear intercept of M1 (88Sr16O τ = 0) vs 88Sr16O/ 86Sr16O τ corrected	m =	-5.38775e-11
					intercept of the linear intercept of M1 (88Sr16O τ = 0) vs 88Sr16O τ = 0 / 86Sr16O τ = 0	c =	8.72779									intercept of the linear intercept of M1 (88Sr16O τ = 0) vs 88Sr16O/ 86Sr16O τ corrected	c =	8.72786
Experiment 230707 8mm - N2O											3.44e-08
NIST SRM 987 0.5ppb	2023-07-07 22:57:06	27019.8	118.641	19498	84.1049	235305	1049.2	4.47647e-08	8.70861		Session Specific τ		27044.9	118.644	19511.1	84.1089	237225	1049.2		8.77151							0.70489	0.00185967		0.70722	0.00186592
NIST SRM 987 0.5ppb	2023-07-08 01:12:49	26136.4	125.191	18915.4	90.8291	228220	1295	3.30787e-08	8.73186		(ns)		26159.9	125.193	18927.7	90.8328	230025	1295		8.79304							0.706345	0.0015042		0.709063	0.00150989
NIST SRM 987 0.5ppb	2023-07-08 03:28:32	26402.6	121.063	19086	82.176	230130	1232.61	4.15403e-08	8.71619		34.4		26426.6	121.066	19098.5	82.1801	231967	1232.61		8.77776							0.705903	0.00161049		0.70879	0.00161706
NIST SRM 987 0.5ppb	2023-07-08 05:44:17	26479.3	140.956	19166.5	100.294	231251	1267.43	3.18644e-08	8.73326		0.816215		26503.5	140.958	19179.1	100.297	233105	1267.43		8.79527							0.706086	0.00165561		0.708959	0.00166235
NIST SRM 987 0.5ppb	2023-07-08 08:00:00	26749.9	120.948	19406.2	90.1405	233675	1158.27	3.02801e-08	8.73554				26774.5	120.95	19419.1	90.1442	235569	1158.27		8.79823		231716	1.21438	8.78716	0.134169		0.707556	0.00164925		0.710334	0.00165573
NIST SRM 987 1ppb	2023-07-07 23:06:49	53509.5	236.745	38863.7	174.944	464401	2456.05	3.09025e-08	8.67886				53608.1	236.746	38915.7	174.946	471941	2456.05		8.80353							0.707987	0.00157606		0.710357	0.00158124
NIST SRM 987 1ppb	2023-07-08 01:22:30	52095.1	233.659	37763.5	170.743	451187	2328.06	3.69333e-08	8.66085				52188.6	233.661	37812.6	170.745	458301	2328.06		8.78162							0.707509	0.0014885		0.710253	0.00149427
NIST SRM 987 1ppb	2023-07-08 03:38:14	52568	267.161	38090.3	194.466	455460	2276.85	3.56407e-08	8.6642				52663.2	267.162	38140.2	194.468	462709	2276.85		8.7862							0.707342	0.00152985		0.710238	0.00153613
NIST SRM 987 1ppb	2023-07-08 05:53:58	52818.5	263.937	38285.2	182.152	458238	2460.46	3.22e-08	8.67572				52914.6	263.938	38335.7	182.154	465577	2460.46		8.79865							0.706779	0.0015662		0.709649	0.00157257
NIST SRM 987 1ppb	2023-07-08 08:09:41	53343.5	252.608	38703.3	173.941	462388	2262.23	3.40191e-08	8.66812				53441.5	252.609	38754.9	173.943	469861	2262.23		8.79206		458335	1.15755	8.79241	0.101346		0.707721	0.00159343		0.710492	0.00159968
NIST SRM 987 2ppb	2023-07-07 23:16:26	104049	442.621	75558.5	341.112	888543	4389.36	3.62606e-08	8.53966				104423	442.622	75755.4	341.113	916558	4389.36		8.77738							0.708025	0.00127527		0.710426	0.00127949
NIST SRM 987 2ppb	2023-07-08 01:32:08	104385	531.374	75614.1	397.951	890220	4791.12	3.78372e-08	8.52825				104761	531.375	75811.3	397.952	918343	4791.12		8.76608							0.707275	0.00116689		0.710039	0.00117139
NIST SRM 987 2ppb	2023-07-08 03:47:52	102652	449.31	74434.2	321.213	878255	3752.58	3.4342e-08	8.55569				103015	449.31	74625.3	321.214	905616	3752.58		8.79108							0.70739	0.00121615		0.710289	0.00122115
NIST SRM 987 2ppb	2023-07-08 06:03:36	106619	473.132	77358.8	344.897	910174	4312.54	3.58143e-08	8.53671				107011	473.132	77565.3	344.898	939592	4312.54		8.78032							0.707392	0.00117572		0.710259	0.00118051
NIST SRM 987 2ppb	2023-07-08 08:19:18	101395	473.79	73556.9	328.683	868612	4103.98	3.31044e-08	8.56665				101749	473.791	73743.5	328.684	895366	4103.98		8.79971		887161	1.75009	8.78291	0.147296		0.707527	0.00116917		0.710288	0.0011737
NIST SRM 987 3ppb	2023-07-08 00:24:21	184962	941.926	134102	653.24	1.54831e+06	7004.45	3.47953e-08	8.37096				186146	941.927	134724	653.241	1.63541e+06	7004.45		8.78563							0.706729	0.00117018		0.709326	0.00117456
NIST SRM 987 3ppb	2023-07-08 02:40:05	165877	696.931	120520	506.807	1.39592e+06	7294.5	3.45101e-08	8.41537				166829	696.932	121022	506.808	1.46633e+06	7294.5		8.78941							0.707803	0.00145988		0.710664	0.00146576
NIST SRM 987 3ppb	2023-07-08 04:55:49	150710	593.384	109347	437.344	1.2739e+06	5470.11	3.40611e-08	8.45263				151496	593.384	109760	437.345	1.33228e+06	5470.11		8.79419							0.706945	0.00135739		0.709841	0.00136295
NIST SRM 987 3ppb	2023-07-08 07:11:33	152319	565.763	110708	445.69	1.2872e+06	5791.72	3.39019e-08	8.45069				153121	565.763	111131	445.69	1.34684e+06	5791.72		8.79589							0.708348	0.00135757		0.711171	0.00136297
NIST SRM 987 3ppb	2023-07-08 09:27:13	164935	691.325	120064	478.365	1.3922e+06	5695.57	3.22505e-08	8.44087				165876	691.325	120562	478.366	1.46223e+06	5695.57		8.81516		1.37951e+06	7.99014	8.79606	0.129761		0.708354	0.00130818		0.71106	0.00131316
NIST SRM 987 4ppb	2023-07-08 00:34:03	212530	1167.18	154673	805.801	1.77144e+06	9994.64	3.30172e-08	8.33501				214095	1167.18	155501	805.801	1.88639e+06	9994.64		8.81099							0.708421	0.0010202		0.711051	0.00102388
NIST SRM 987 4ppb	2023-07-08 02:49:47	213716	971.566	155395	744.424	1.7714e+06	9354.97	3.63849e-08	8.28854				215299	971.566	156230	744.425	1.88634e+06	9354.97		8.7615							0.708845	0.00123992		0.711719	0.00124497
NIST SRM 987 4ppb	2023-07-08 05:05:30	214557	878.515	156044	647.31	1.78201e+06	8062.67	3.49444e-08	8.30553				216152	878.515	156886	647.311	1.89838e+06	8062.67		8.78262							0.708427	0.00121587		0.711326	0.00122084
NIST SRM 987 4ppb	2023-07-08 07:21:14	215605	932.193	156528	735.174	1.78981e+06	8392.57	3.50918e-08	8.30135				217216	932.193	157376	735.174	1.90724e+06	8392.57		8.78039							0.707782	0.00132188		0.710594	0.0013271
NIST SRM 987 4ppb	2023-07-08 09:36:56	223614	844.514	162415	581.471	1.8543e+06	7596.51	3.44889e-08	8.29243				225347	844.514	163328	581.472	1.98064e+06	7596.51		8.7893		1.79379e+06	1.93466	8.78496	0.203085		0.707188	0.00103471		0.709881	0.00103866
USGS BIR-1	2023-07-07 23:26:12	102892	253.628	73801.2	174.727	880195	2695.32	3.44333e-08	8.55455				103257	253.629	73989	174.729	907678	2695.32		8.79043							0.699977	0.00117578		0.702379	0.00117978
USGS BIR-1	2023-07-08 01:41:55	102181	352.761	73385.1	279.432	873745	3733.29	3.52099e-08	8.55099				102541	352.762	73570.8	279.433	900821	3733.29		8.78498							0.700457	0.00135898		0.703211	0.00136436
USGS BIR-1	2023-07-08 03:57:38	103060	380.218	74108.7	280.75	881995	3933.06	3.38555e-08	8.55804				103427	380.219	74298.1	280.751	909593	3933.06		8.79453							0.700664	0.00124374		0.703537	0.00124885
USGS BIR-1	2023-07-08 06:13:22	103483	335.39	74548.1	243.017	885156	3234.53	3.43685e-08	8.55366				103852	335.391	74739.8	243.018	912955	3234.53		8.79089							0.702145	0.00136474		0.704985	0.00137025
USGS BIR-1	2023-07-08 08:29:05	104815	371.795	75392.4	252.611	897240	3601.49	3.29726e-08	8.56019				105195	371.796	75588.5	252.612	925815	3601.49		8.80096		883666	0.979604	8.79236	0.0670426		0.701158	0.00129175		0.703887	0.00129682
USGS W-2	2023-07-07 23:55:16	119719	697.785	86657.7	498.783	1.02092e+06	6028.92	3.30734e-08	8.52761				120214	697.785	86916.8	498.783	1.05808e+06	6028.92		8.8016							0.705205	0.0014867		0.707712	0.00149203
USGS W-2	2023-07-08 02:11:00	120687	556.678	87215.5	408.213	1.02938e+06	5437.02	3.25795e-08	8.52939				121190	556.679	87477.9	408.213	1.06717e+06	5437.02		8.8058							0.703877	0.00131284		0.70669	0.00131804
USGS W-2	2023-07-08 04:26:43	122304	540.906	88537.9	395.751	1.04201e+06	5023.54	3.33603e-08	8.51985				122821	540.906	88808.4	395.752	1.08075e+06	5023.54		8.79942							0.705334	0.00120596		0.708228	0.00121091
USGS W-2	2023-07-08 06:42:28	123729	589.262	89496.3	383.963	1.05419e+06	4925.05	3.29294e-08	8.52022				124257	589.262	89772.7	383.964	1.09386e+06	4925.05		8.8032							0.704626	0.00140624		0.707456	0.00141189
USGS W-2	2023-07-08 08:58:09	124595	547.837	90054.7	420.577	1.0595e+06	5073.21	3.47857e-08	8.50354				125132	547.838	90334.6	420.578	1.09958e+06	5073.21		8.78736		1.0412e+06	1.56012	8.79948	0.0813833		0.704969	0.0012509		0.707687	0.00125572
																						covariance used to calculate τ uncertainty following Iso et al. (1995)	2.36951		0.123441
					slope of the linear intercept of M1 (88Sr16O τ = 0) vs 88Sr16O τ = 0 / 86Sr16O τ = 0	m =	-2.67903e-07									slope of the linear intercept of M1 (88Sr16O τ = 0) vs 88Sr16O/ 86Sr16O τ corrected	m =	1.69104e-12
					intercept of the linear intercept of M1 (88Sr16O τ = 0) vs 88Sr16O τ = 0 / 86Sr16O τ = 0	c =	8.79067									intercept of the linear intercept of M1 (88Sr16O τ = 0) vs 88Sr16O/ 86Sr16O τ corrected	c =	8.79076
Experiment 230707 6mm - N2O											3.555e-08
NIST SRM 987 0.5ppb	2023-07-08 10:45:03	29650.2	125.687	21579.7	98.1011	261093	1169.66	1.96398e-08	8.80578		Session Specific τ		29681.5	125.693	21596.3	98.1099	263539	1169.66		8.87891							0.706849	0.00172607		0.709747	0.00173313
NIST SRM 987 0.5ppb	2023-07-08 13:00:42	30461.8	115.465	22144.3	87.8287	267671	1123.61	2.80474e-08	8.78711		(ns)		30494.8	115.472	22161.8	87.8386	270243	1123.61		8.86192							0.706668	0.00169261		0.709518	0.00169944
NIST SRM 987 0.5ppb	2023-07-08 15:16:25	31190.8	119.764	22650.8	84.1184	273319	1285.4	3.87983e-08	8.76281		35.55		31225.4	119.771	22669	84.1287	276001	1285.4		8.83898							0.706624	0.00175862		0.709598	0.001766
NIST SRM 987 0.5ppb	2023-07-08 17:32:06	31571.5	125.21	22919.8	102.269	276683	1248.75	3.79231e-08	8.76369		1.31399		31607	125.217	22938.5	102.278	279432	1248.75		8.84081							0.70626	0.00160376		0.709144	0.00161028
NIST SRM 987 0.5ppb	2023-07-08 19:47:49	31928.1	122.539	23219.1	95.7325	279886	1349.27	3.63817e-08	8.76612				31964.4	122.546	23238.3	95.7415	282699	1349.27		8.84417		271731	2.749	8.85296	0.193527		0.707399	0.00187685		0.710359	0.00188472
NIST SRM 987 1ppb	2023-07-08 10:54:44	59123.7	237.019	42983.8	174.968	514265	2490.51	3.66538e-08	8.69812				59248.3	237.023	43049.6	174.973	523842	2490.51		8.84148							0.707396	0.00146979		0.710291	0.00147582
NIST SRM 987 1ppb	2023-07-08 13:10:24	60671.8	227.239	44198.3	171.186	529503	2059.78	2.85656e-08	8.72734				60802.9	227.242	44267.8	171.191	539662	2059.78		8.87559							0.707108	0.00127828		0.709964	0.00128346
NIST SRM 987 1ppb	2023-07-08 15:26:06	62322	245.433	45368.6	180.955	540571	2456.09	4.05935e-08	8.67385				62460.3	245.437	45441.9	180.96	551163	2456.09		8.82421							0.708692	0.00134964		0.71168	0.00135534
NIST SRM 987 1ppb	2023-07-08 17:41:47	62699.7	240.278	45552.5	189.738	545204	2600.44	3.51919e-08	8.69548				62839.7	240.281	45626.4	189.742	555980	2600.44		8.84758							0.706324	0.00129833		0.709203	0.00130361
NIST SRM 987 1ppb	2023-07-08 19:57:31	63869.6	225.83	46508.9	173.157	555408	2602.97	3.44312e-08	8.69597				64014.9	225.834	46585.9	173.162	566595	2602.97		8.85099		536990	2.93259	8.84797	0.209848		0.707819	0.00134514		0.710794	0.00135076
NIST SRM 987 2ppb	2023-07-08 11:04:25	110139	507.992	80203.3	387.285	946234	4842.57	3.43085e-08	8.5913				110572	507.994	80432.6	387.287	979172	4842.57		8.85555							0.707345	0.00124611		0.710233	0.00125119
NIST SRM 987 2ppb	2023-07-08 13:20:05	116398	521.856	84722.2	368.085	995162	4325.89	3.79541e-08	8.54967				116881	521.858	84978.1	368.088	1.03166e+06	4325.89		8.82656							0.707838	0.00117201		0.710702	0.00117678
NIST SRM 987 2ppb	2023-07-08 15:35:48	119873	498.119	87175.1	364.937	1.02738e+06	4728.99	3.41648e-08	8.57062				120386	498.121	87446.1	364.939	1.06633e+06	4728.99		8.85761							0.706219	0.00116556		0.709197	0.00117047
NIST SRM 987 2ppb	2023-07-08 17:51:29	125147	562.359	91222.9	395.17	1.07019e+06	5222.15	3.50804e-08	8.55146				125706	562.36	91519.7	395.172	1.11251e+06	5222.15		8.85012							0.708151	0.00122373		0.711032	0.00122872
NIST SRM 987 2ppb	2023-07-08 20:07:13	119273	465.943	86830.7	349.828	1.02206e+06	4895.02	3.45424e-08	8.56902				119781	465.944	87099.5	349.83	1.06059e+06	4895.02		8.8544		1.0122e+06	4.5089	8.84885	0.144171		0.707113	0.00131931		0.710098	0.00132484
NIST SRM 987 3ppb	2023-07-08 12:12:16	211922	537.391	154830	399.084	1.77646e+06	5927.71	3.32487e-08	8.38259				213531	537.392	155687	399.087	1.89621e+06	5927.71		8.88025							0.70776	0.00113643		0.710615	0.00114102
NIST SRM 987 3ppb	2023-07-08 14:27:56	182212	508.97	132791	369.988	1.53491e+06	5266.74	3.50628e-08	8.42376				183400	508.972	133421	369.99	1.62349e+06	5266.74		8.85222							0.707508	0.00106358		0.710443	0.00106802
NIST SRM 987 3ppb	2023-07-08 16:43:38	173089	390.134	126031	290.481	1.45921e+06	4737.92	3.63018e-08	8.4304				174161	390.136	126599	290.484	1.53905e+06	4737.92		8.83694							0.707567	0.00126602		0.710504	0.00127129
NIST SRM 987 3ppb	2023-07-08 18:59:20	194829	628.312	142200	446.151	1.63736e+06	6009.28	3.43983e-08	8.40411				196188	628.313	142923	446.153	1.73856e+06	6009.28		8.86173							0.707916	0.00110486		0.710823	0.00110941
NIST SRM 987 3ppb	2023-07-08 21:15:03	191809	489.007	139761	356.871	1.61274e+06	5733.12	3.46116e-08	8.40805				193126	489.009	140459	356.873	1.71083e+06	5733.12		8.85861		1.60414e+06	7.41987	8.85795	0.177292		0.707294	0.0011894		0.710373	0.00119453
NIST SRM 987 4ppb	2023-07-08 12:21:57	243943	1015.71	177988	760.648	2.02065e+06	9716.26	3.54942e-08	8.28329				246077	1015.71	179121	760.649	2.17704e+06	9716.26		8.84697							0.708125	0.00107594		0.710979	0.00108028
NIST SRM 987 4ppb	2023-07-08 14:37:39	249268	924.953	181728	661.906	2.06022e+06	8326.68	3.59394e-08	8.26507				251496	924.954	182910	661.907	2.22303e+06	8326.68		8.83922							0.707837	0.00116105		0.710784	0.00116587
NIST SRM 987 4ppb	2023-07-08 16:53:19	247541	985.607	180463	712.255	2.05167e+06	8039.44	3.46539e-08	8.28818				249739	985.608	181628	712.256	2.21308e+06	8039.44		8.86158							0.706909	0.0011188		0.709833	0.00112338
NIST SRM 987 4ppb	2023-07-08 19:09:01	252608	1028.59	184187	751.255	2.08415e+06	8664.24	3.64161e-08	8.25053				254898	1028.59	185401	751.256	2.25093e+06	8664.24		8.83072							0.708231	0.00108599		0.711148	0.00109049
NIST SRM 987 4ppb	2023-07-08 21:24:45	265564	955.036	193866	665.052	2.19041e+06	9221.52	3.47886e-08	8.24814				268095	955.037	195212	665.054	2.37538e+06	9221.52		8.86021		2.08142e+06	3.12411	8.84774	0.150542		0.707845	0.00130815		0.710939	0.00131382
USGS BIR-1	2023-07-08 11:14:07	114331	313.223	82499.1	249.053	979814	3271.84	3.59106e-08	8.56995				114798	313.226	82741.8	249.057	1.01518e+06	3271.84		8.84314							0.700911	0.00119053		0.703767	0.00119535
USGS BIR-1	2023-07-08 13:29:47	118413	206.898	85395.2	160.19	1.01543e+06	2597.04	3.3972e-08	8.57536				118914	206.902	85655.2	160.196	1.05346e+06	2597.04		8.85906							0.700255	0.0011168		0.703096	0.00112136
USGS BIR-1	2023-07-08 15:45:30	120678	251.759	86931.1	177.708	1.03013e+06	3278.04	3.83318e-08	8.5362				121198	251.763	87200.5	177.712	1.06929e+06	3278.04		8.82268							0.701146	0.00126824		0.704101	0.00127358
USGS BIR-1	2023-07-08 18:01:12	121321	257.277	87400.5	212.37	1.03776e+06	3480.76	3.58912e-08	8.55378				121847	257.281	87672.9	212.374	1.07751e+06	3480.76		8.84313							0.700014	0.00124457		0.702861	0.00124963
USGS BIR-1	2023-07-08 20:16:54	123600	218.233	89013.2	153.679	1.05828e+06	2863.93	3.4183e-08	8.56218				124145	218.237	89295.8	153.684	1.09965e+06	2863.93		8.85781		1.02428e+06	2.85784	8.84516	0.16643		0.699124	0.00103112		0.702089	0.00103545
USGS W-2	2023-07-08 11:43:12	133692	448.264	96971.6	309.701	1.13795e+06	4626.57	3.74418e-08	8.51172				134330	448.266	97307.1	309.703	1.18592e+06	4626.57		8.82841							0.705475	0.00140014		0.708333	0.00140583
USGS W-2	2023-07-08 13:58:53	138813	442.839	100561	292.977	1.17984e+06	4102.1	3.74311e-08	8.49951				139501	442.841	100921	292.98	1.23149e+06	4102.1		8.82784							0.704623	0.00112034		0.707512	0.00112493
USGS W-2	2023-07-08 16:14:34	140322	422.246	101585	287.194	1.18918e+06	3723.43	3.98022e-08	8.47465				141025	422.248	101953	287.197	1.24167e+06	3723.43		8.80459							0.704999	0.00112113		0.707954	0.00112581
USGS W-2	2023-07-08 18:30:16	140873	421.634	102067	285.675	1.19752e+06	4159.7	3.67557e-08	8.50067				141582	421.636	102439	285.678	1.25076e+06	4159.7		8.83418							0.704573	0.00105238		0.707445	0.00105665
USGS W-2	2023-07-08 20:45:59	142409	482.574	103257	318.821	1.20651e+06	4565.95	3.94963e-08	8.47213				143133	482.575	103637	318.824	1.26057e+06	4565.95		8.80699		1.1822e+06	2.25316	8.8204	0.154148		0.706218	0.00110604		0.709253	0.00111076
																						covariance used to calculate τ uncertainty following Iso et al. (1995)	3.69221		0.170851
					slope of the linear intercept of M1 (88Sr16O τ = 0) vs 88Sr16O τ = 0 / 86Sr16O τ = 0	m =	-2.79061e-07									slope of the linear intercept of M1 (88Sr16O τ = 0) vs 88Sr16O/ 86Sr16O τ corrected	m =	5.94939e-11
					intercept of the linear intercept of M1 (88Sr16O τ = 0) vs 88Sr16O τ = 0 / 86Sr16O τ = 0	c =	8.84602									intercept of the linear intercept of M1 (88Sr16O τ = 0) vs 88Sr16O/ 86Sr16O τ corrected	c =	8.8458
Experiment 230811 - N2O											3.645e-08
NIST SRM 987 0.5ppb	2023-08-11 18:36:14	22991.2	156.424	16822.1	107.631	199456	1466.53	4.07905e-08	8.67536		Session Specific τ		23010.4	156.428	16832.4	107.636	200917	1466.53		8.73157							0.716509	0.00197495		0.711004	0.00195976
NIST SRM 987 0.5ppb	2023-08-12 10:55:06	23995	110.015	17589.4	83.2585	209027	1146.71	1.67254e-08	8.71126		(ns)		24016	110.02	17600.7	83.2649	210632	1146.71		8.77047		204242	3.31343	8.75102	0.314309		0.716142	0.00208318		0.71122	0.00206886
											36.45
NIST SRM 987 1ppb	2023-08-11 18:45:55	46128.9	286.123	33808.3	211.93	397246	2778.15	4.12053e-08	8.61165		1.03246		46206.6	286.125	33850	211.933	403083	2778.15		8.72348							0.717811	0.00223165		0.712301	0.00221454
NIST SRM 987 1ppb	2023-08-12 11:04:48	48267.2	226.605	35369.6	169.603	416845	2466.32	3.16595e-08	8.63619				48352.3	226.608	35415.3	169.606	423276	2466.32		8.75401		407046	3.4046	8.73875	0.246986		0.716421	0.00215257		0.711504	0.00213781
NIST SRM 987 2ppb	2023-08-11 18:55:37	92499.3	538.687	67696.6	373.949	786415	5363.39	3.88587e-08	8.50184				92812.3	538.688	67864.1	373.95	809622	5363.39		8.72323							0.716514	0.00229236		0.711021	0.00227477
NIST SRM 987 2ppb	2023-08-12 11:14:29	97269.9	456.384	71238.2	329.519	828605	4416.42	3.42632e-08	8.51862				97616	456.385	71423.6	329.521	854411	4416.42		8.75278		807510	3.69447	8.738	0.239125		0.715696	0.00190892		0.71079	0.00189583
NIST SRM 987 3ppb	2023-08-11 19:05:18	137836	829.865	100899	592.233	1.16109e+06	7646.44	3.50114e-08	8.42374				138532	829.865	101272	592.233	1.2124e+06	7646.44		8.75181							0.715026	0.00182244		0.70955	0.00180849
NIST SRM 987 3ppb	2023-08-12 11:24:10	146493	722.938	107071	496.291	1.2297e+06	6550.75	3.61575e-08	8.39425				147280	722.939	107491	496.292	1.28741e+06	6550.75		8.74123		1.1954e+06	4.05847	8.74652	0.085555		0.714371	0.00176815		0.709479	0.00175603
NIST SRM 987 4ppb	2023-08-11 19:15:02	186916	1011.03	136992	737.375	1.55052e+06	10387.5	3.69271e-08	8.29525				188166	1011.03	137662	737.377	1.64097e+06	10387.5		8.72083							0.716473	0.00205073		0.710991	0.00203502
NIST SRM 987 4ppb	2023-08-11 23:27:02	192451	1184.43	141041	809.007	1.59941e+06	9688.07	3.45475e-08	8.31073				193776	1184.43	141752	809.008	1.69583e+06	9688.07		8.75147							0.715077	0.0018741		0.709755	0.00186015
NIST SRM 987 4ppb	2023-08-12 03:58:21	195152	1032.63	143123	747.913	1.62302e+06	7751.63	3.3567e-08	8.31673				196515	1032.63	143855	747.914	1.7224e+06	7751.63		8.76475							0.715046	0.00148232		0.709885	0.00147163
NIST SRM 987 4ppb	2023-08-12 08:20:03	194847	960.475	142616	698.113	1.61706e+06	8824.38	3.50988e-08	8.29912				196206	960.476	143343	698.114	1.71568e+06	8824.38		8.74431							0.714421	0.00176601		0.70942	0.00175366
NIST SRM 987 4ppb	2023-08-12 11:33:52	197448	895.843	144857	658.238	1.63831e+06	8226.15	3.47762e-08	8.29743				198844	895.844	145607	658.239	1.73963e+06	8226.15		8.74873		1.60566e+06	2.10681	8.74602	0.183055		0.715885	0.00181456		0.710988	0.00180216
USGS BIR-1	2023-08-11 19:24:43	175050	1047.73	126703	736.953	1.45596e+06	10251.7	3.73608e-08	8.31738				176147	1047.73	127277	736.954	1.53544e+06	10251.7		8.7168							0.70781	0.00180766		0.7024	0.00179381
USGS BIR-1	2023-08-11 23:36:43	177886	951.826	129130	608.394	1.48025e+06	8113.28	3.64035e-08	8.32133				179018	951.827	129725	608.395	1.56247e+06	8113.28		8.728							0.709383	0.00194343		0.704109	0.00192896
USGS BIR-1	2023-08-12 04:08:03	180683	822.553	130789	565.873	1.49815e+06	8484.71	3.85327e-08	8.2916				181851	822.554	131399	565.875	1.58243e+06	8484.71		8.70179							0.708405	0.00174606		0.703297	0.00173346
USGS BIR-1	2023-08-12 08:29:44	179830	742.238	130664	547.102	1.49928e+06	8051.61	3.45704e-08	8.33723				180987	742.239	131274	547.104	1.58369e+06	8051.61		8.75032							0.708756	0.00169838		0.7038	0.00168649
USGS BIR-1	2023-08-12 11:43:34	181216	777.992	131602	512.982	1.51234e+06	7707.37	3.35644e-08	8.34551				182391	777.993	132221	512.984	1.59827e+06	7707.37		8.76287		1.4892e+06	1.4643	8.73196	0.283335		0.708209	0.0016761		0.703371	0.00166465
USGS W-2	2023-08-11 19:34:25	175045	1009.32	127403	727.014	1.45572e+06	10108.8	3.74685e-08	8.31624				176141	1009.32	127982	727.015	1.53516e+06	10108.8		8.71553							0.711814	0.00198266		0.706379	0.00196751
USGS W-2	2023-08-11 23:46:24	178288	1059.63	130019	738.605	1.48626e+06	9785.28	3.49552e-08	8.33629				179425	1059.63	130623	738.606	1.56917e+06	9785.28		8.74554							0.711608	0.00177067		0.706324	0.00175752
USGS W-2	2023-08-12 04:17:43	180830	1027.43	131862	689.029	1.50881e+06	9973.58	3.379e-08	8.3438				182000	1027.43	132483	689.031	1.59432e+06	9973.58		8.76003							0.711292	0.00188028		0.70617	0.0018667
USGS W-2	2023-08-12 08:39:26	180953	1016.4	132265	704.145	1.50693e+06	8372.58	3.52093e-08	8.32774				182125	1016.4	132890	704.146	1.59223e+06	8372.58		8.74252							0.713931	0.00150083		0.708944	0.00149033
USGS W-2	2023-08-12 11:53:16	181938	938.783	132797	662.216	1.52132e+06	9041.91	3.19865e-08	8.36176				183123	938.784	133427	662.217	1.6083e+06	9041.91		8.78267		1.49581e+06	1.71819	8.74926	0.281669		0.71099	0.00159357		0.706139	0.00158269
																						covariance used to calculate τ uncertainty following Iso et al. (1995)	2.82289		0.233433
					slope of the linear intercept of M1 (88Sr16O τ = 0) vs 88Sr16O τ = 0 / 86Sr16O τ = 0	m =	-2.7288e-07									slope of the linear intercept of M1 (88Sr16O τ = 0) vs 88Sr16O/ 86Sr16O τ corrected	m =	2.97491e-11
					intercept of the linear intercept of M1 (88Sr16O τ = 0) vs 88Sr16O τ = 0 / 86Sr16O τ = 0	c =	8.73832									intercept of the linear intercept of M1 (88Sr16O τ = 0) vs 88Sr16O/ 86Sr16O τ corrected	c =	8.74278

## Sheet: Supplementary Table 3
Reference Material concentration blocks	Experiment time	86Sr16O τ = 0	2SE	87Sr16O τ = 0	2SE	88Sr16O τ = 0	2SE	calculated individual τ	88Sr16O τ = 0 / 86Sr16O τ = 0				86Sr16O session specific τ	2SE	87Sr16O session specific τ	2SE	88Sr16O session specific τ	2SE		88Sr16O/ 86Sr16O τ corrected		average τ corrected for each RM concentration block					τ and Mass Bias Corrected
																						88Sr16O τ = 0	%std	88Sr16O/ 86Sr16O τ corrected	%std		88Sr/ 86Sr	2SE
Deflect Experiment											3.71e-08
Deflect -2.1 V
NIST SRM 987 15ppb	2025-02-06 11:11:48	43487.8	210.569	31845.7	146.37	371527	1799.83	3.14749e-08	8.54324		Session Specific τ		43558.1	210.572	31883.4	146.373	376720	1799.83		8.64867		average & std of NIST SRM 987 15ppb					0.720295	0.00131525
NIST SRM 987 15ppb	2025-02-06 11:21:29	44058	270.99	32370.1	131.364	376761	1602.25	2.81763e-08	8.55147		(ns)		44130.2	270.992	32409	131.368	382102	1602.25		8.65852		390746	2.98398	8.63703	0.155416		0.721171	0.00121829
NIST SRM 987 30ppb	2025-02-06 11:31:11	92888.1	313.129	68079	138.006	779635	2117.39	4.02032e-08	8.39326		37.1		93209.4	313.131	68251.4	138.009	802857	2117.39		8.61348							0.721552	0.00107615
NIST SRM 987 30ppb	2025-02-06 11:40:52	93219.1	269.799	68130.8	192.676	780887	2480.68	4.28832e-08	8.37691		1.03375		93542.6	269.801	68303.4	192.678	804185	2480.68		8.597							0.720678	0.00104905
NIST SRM 987 60ppb	2025-02-06 11:50:34	189874	533.98	139052	374.826	1.55301e+06	5067.3	3.82446e-08	8.17917				191221	533.981	139773	374.827	1.64796e+06	5067.3		8.6181		average & std of NIST SRM 987 30ppb					0.720339	0.00102599
NIST SRM 987 60ppb	2025-02-06 12:00:14	190366	627.095	139639	411.052	1.55864e+06	5256.32	3.74013e-08	8.18756				191720	627.096	140367	411.053	1.6543e+06	5256.32		8.62869		803635	2.84102	8.62555	0.13721		0.72129	0.00112814
NIST SRM 987 15ppb	2025-02-06 12:19:37	45821.9	266.242	33596.5	145.057	390634	1665	3.60369e-08	8.52505				45900	266.244	33638.5	145.061	396379	1665		8.63571							0.720833	0.00118119
NIST SRM 987 30ppb	2025-02-06 12:29:18	96675.6	245.76	70647.8	279.937	811762	2451.67	3.80477e-08	8.39676				97023.6	245.762	70833.4	279.939	836968	2451.67		8.62644		average & std of NIST SRM 987 60ppb					0.720475	0.00103959
NIST SRM 987 60ppb	2025-02-06 12:39:01	194729	595.996	142699	413.95	1.59313e+06	5275.16	3.71096e-08	8.18126				196146	595.997	143458	413.951	1.6932e+06	5275.16		8.63237		1.58884e+06	2.51905	8.63455	0.209264		0.720236	0.000973608
Deflect -3.1 V
NIST SRM 987 15ppb	2025-02-06 13:08:18	46680.9	201.297	34174.9	154.623	398226	1777.1	3.34586e-08	8.5308				46761.9	201.299	34218.3	154.626	404197	1777.1		8.64373							0.72024	0.00128196
NIST SRM 987 15ppb	2025-02-06 13:18:00	46949.3	182.985	34356.2	121.877	399794	1559.76	3.83611e-08	8.51544				47031.2	182.988	34400	121.881	405813	1559.76		8.62859							0.720567	0.00127894
NIST SRM 987 30ppb	2025-02-06 13:27:42	97925.6	212.316	71786.8	152.68	821836	2020.39	3.82682e-08	8.39245				98282.7	212.318	71978.5	152.683	847682	2020.39		8.62494							0.721401	0.00115165
NIST SRM 987 30ppb	2025-02-06 13:37:23	97091.6	308.237	71262.1	212.499	816093	2707.4	3.64611e-08	8.40539				97442.6	308.239	71451	212.502	841573	2707.4		8.6366							0.721857	0.00110766
NIST SRM 987 60ppb	2025-02-06 13:47:06	197235	591.661	144646	435.837	1.61409e+06	5576.94	3.64367e-08	8.18361				198689	591.662	145426	435.838	1.71691e+06	5576.94		8.64119							0.720535	0.000976648
NIST SRM 987 60ppb	2025-02-06 13:56:47	199126	681.985	146070	475.725	1.63095e+06	5642.54	3.55038e-08	8.19054				200608	681.986	146865	475.726	1.73599e+06	5642.54		8.65364							0.720037	0.00107998
NIST SRM 987 15ppb	2025-02-06 14:16:11	47229.5	246.879	34591.5	125.979	403215	1705.91	3.09111e-08	8.53737				47312.4	246.881	34636	125.984	409339	1705.91		8.65183							0.719568	0.00135236
NIST SRM 987 30ppb	2025-02-06 14:25:52	99208.6	188.097	72788	130.547	832256	1985.94	3.83399e-08	8.38895				99575.1	188.1	72985.1	130.552	858772	1985.94		8.62437							0.72208	0.00115365
NIST SRM 987 60ppb	2025-02-06 14:35:33	199457	577.766	146278	389.024	1.6288e+06	4668.19	3.75111e-08	8.16616				200944	577.767	147077	389.026	1.73355e+06	4668.19		8.62706							0.721014	0.00102393
Deflect -4.1 V
NIST SRM 987 15ppb	2025-02-06 15:04:51	46628.7	186.407	34048.4	135.079	396998	1560.72	3.90931e-08	8.51404				46709.5	186.409	34091.4	135.083	402933	1560.72		8.62637							0.718927	0.00140711
NIST SRM 987 15ppb	2025-02-06 15:14:32	46588.7	259.67	34140.4	106.265	397960	1450.75	2.97986e-08	8.54198				46669.4	259.672	34183.7	106.27	403924	1450.75		8.65501							0.719343	0.0013514
NIST SRM 987 30ppb	2025-02-06 15:24:14	97916.7	181.995	71632.5	131.294	823982	2253.06	3.45609e-08	8.41514				98273.7	181.998	71823.3	131.298	849966	2253.06		8.64897							0.719023	0.00124495
NIST SRM 987 30ppb	2025-02-06 15:33:56	97039.7	239.302	70981	189.736	814115	2723.52	3.91056e-08	8.3895				97390.3	239.304	71168.4	189.738	839470	2723.52		8.61965							0.719729	0.00118884
NIST SRM 987 60ppb	2025-02-06 15:43:37	195973	1065.72	143783	395.685	1.60528e+06	5181.06	3.60084e-08	8.19131				197409	1065.72	144554	395.686	1.70694e+06	5181.06		8.64672							0.719808	0.00105622
NIST SRM 987 60ppb	2025-02-06 15:53:19	195866	742.129	143617	420.455	1.60275e+06	5218.32	3.6755e-08	8.18287				197300	742.13	144386	420.457	1.70408e+06	5218.32		8.63698							0.720202	0.00102114
NIST SRM 987 15ppb	2025-02-06 16:12:41	46651.6	294.268	34139.3	124.141	398305	1519.85	3.11314e-08	8.53785				46732.5	294.27	34182.6	124.146	404279	1519.85		8.65091							0.718593	0.0013353
NIST SRM 987 30ppb	2025-02-06 16:22:24	97783.3	482.326	71667.6	125.079	820532	2102.61	3.85083e-08	8.39133				98139.4	482.327	71858.7	125.084	846295	2102.61		8.6234							0.720677	0.00114864
NIST SRM 987 60ppb	2025-02-06 16:32:05	197377	584.337	144561	440.071	1.60903e+06	7552.29	3.91193e-08	8.15207				198833	584.338	145341	440.072	1.71118e+06	7552.29		8.60612							0.720915	0.00098472
Deflect -5.1 V
NIST SRM 987 15ppb	2025-02-06 17:01:22	46888.2	209.905	34298.9	146.2	398969	1783.35	4.05765e-08	8.50893				46969.9	209.908	34342.6	146.204	404963	1783.36		8.62175							0.720303	0.00139196
NIST SRM 987 15ppb	2025-02-06 17:11:04	47040.7	186.541	34353.8	145.74	399909	2398.04	4.29683e-08	8.50134				47122.9	186.544	34397.7	145.744	405932	2398.04		8.61431							0.719119	0.00136001
NIST SRM 987 30ppb	2025-02-06 17:20:45	97700.9	261.798	71501	157.062	820712	2260.43	3.70762e-08	8.40025				98056.3	261.8	71691.2	157.066	846486	2260.43		8.63265							0.719885	0.00101194
NIST SRM 987 30ppb	2025-02-06 17:30:27	97392.8	261.557	71179.4	199.472	816499	3812.87	3.99442e-08	8.38357				97746	261.56	71367.8	199.475	842005	3812.87		8.61422							0.71953	0.00108813
NIST SRM 987 60ppb	2025-02-06 17:40:10	197836	503.156	144517	750.606	1.61228e+06	11103.6	3.92445e-08	8.14956				199299	503.157	145296	750.607	1.71485e+06	11103.6		8.60443							0.71962	0.00105282
NIST SRM 987 60ppb	2025-02-06 17:49:49	197589	1091.69	144829	425.53	1.61826e+06	5305.14	3.58238e-08	8.19002				199049	1091.69	145612	425.531	1.72162e+06	5305.14		8.64926							0.718833	0.00110392
NIST SRM 987 15ppb	2025-02-06 18:09:12	47035.2	186.343	34299.6	183.292	400459	1702.37	3.87555e-08	8.51404				47117.4	186.346	34343.3	183.294	406499	1702.37		8.62736							0.7194	0.00105783
NIST SRM 987 30ppb	2025-02-06 18:18:53	98171.3	469.761	71946.4	152.113	825016	2210.23	3.63122e-08	8.40384				98530.2	469.762	72139	152.117	851066	2210.23		8.63761							0.720064	0.00113688
NIST SRM 987 60ppb	2025-02-06 18:28:34	198593	1007.68	145873	384.537	1.63043e+06	5251.21	3.39597e-08	8.20989				200067	1007.68	146666	384.538	1.7354e+06	5251.21		8.67409							0.719523	0.00101905
Deflect -6.1 V
NIST SRM 987 15ppb	2025-02-06 18:57:52	44129.9	190.079	32264.5	138.834	376135	1673.41	3.80119e-08	8.52337				44202.3	190.082	32303.2	138.838	381458	1673.41		8.62984							0.71991	0.00125511
NIST SRM 987 15ppb	2025-02-06 19:07:34	44401.3	156.113	32493.3	112.352	378519	1408.47	3.72201e-08	8.52496				44474.5	156.116	32532.5	112.357	383911	1408.48		8.63214							0.720488	0.00122212
NIST SRM 987 30ppb	2025-02-06 19:17:15	92598.1	433.397	67816.3	129.028	779190	2016.42	3.6612e-08	8.41476				92917.3	433.398	67987.3	129.033	802386	2016.42		8.63548							0.71979	0.00120209
NIST SRM 987 30ppb	2025-02-06 19:26:56	92091	222.391	67288.3	156.226	774194	2403.53	3.81895e-08	8.40683				92406.7	222.394	67456.7	156.229	797088	2403.53		8.62587							0.718981	0.00114212
NIST SRM 987 60ppb	2025-02-06 19:36:38	186628	981.634	136840	329.798	1.53159e+06	4215.18	3.64299e-08	8.20663				187930	981.634	137539	329.799	1.62386e+06	4215.18		8.6408							0.719663	0.00107367
NIST SRM 987 60ppb	2025-02-06 19:46:19	185380	490.033	135860	366.474	1.51909e+06	4737.51	3.77779e-08	8.19448				186663	490.035	136548	366.475	1.60982e+06	4737.51		8.62417							0.720848	0.00104079
NIST SRM 987 15ppb	2025-02-06 20:05:41	43845.6	170.839	32063.6	131.642	373778	1573.17	3.7724e-08	8.52487				43917	170.843	32101.8	131.646	379034	1573.17		8.63069							0.719847	0.00133216
NIST SRM 987 30ppb	2025-02-06 20:15:23	91687	458.52	67132	121.375	770726	1987.35	3.84945e-08	8.40605				92000	458.521	67299.7	121.38	793413	1987.35		8.62405							0.72003	0.000987571
NIST SRM 987 60ppb	2025-02-06 20:25:04	185943	498.453	136092	354.076	1.52523e+06	4266.08	3.69221e-08	8.20267				187235	498.454	136782	354.077	1.61672e+06	4266.08		8.63469							0.719328	0.000964026
																						covariance used to calculate τ uncertainty following Iso et al. (1995)	2.78135		0.167297
					slope of the linear intercept of M1 (88Sr16O τ = 0) vs 88Sr16O τ = 0 / 86Sr16O τ = 0	m =	-2.83254e-07									slope of the linear intercept of M1 (88Sr16O τ = 0) vs 88Sr16O/ 86Sr16O τ corrected	m =	2.99566e-11
					intercept of the linear intercept of M1 (88Sr16O τ = 0) vs 88Sr16O τ = 0 / 86Sr16O τ = 0	c =	8.6325									intercept of the linear intercept of M1 (88Sr16O τ = 0) vs 88Sr16O/ 86Sr16O τ corrected	c =	8.63238
Plate Bias Experiment											3.65e-08
Plate Bias -75 V
NIST SRM 987 15ppb	2025-02-18 11:04:47	44187.8	196.401	32102.5	170.298	375515	1598.68	4.54332e-08	8.49818		Session Specific τ		44259.1	196.43	32140.2	170.332	380734	1598.68		8.60238		average & std of NIST SRM 987 15ppb					0.71792	0.00127008
NIST SRM 987 15ppb	2025-02-18 11:14:29	44545.3	178.322	32414.2	124.781	378142	1452.81	4.83239e-08	8.48893		(ns)		44617.8	178.354	32452.6	124.827	383434	1452.81		8.59374		408026	9.56377	8.62879	0.298534		0.717825	0.00117773
NIST SRM 987 30ppb	2025-02-18 11:24:10	92972.7	481.943	67818.9	109.345	780201	1699.33	3.97547e-08	8.39172		36.5		93289.3	481.955	67987.2	109.397	803070	1699.34		8.60838							0.717884	0.00099988
NIST SRM 987 30ppb	2025-02-18 11:33:51	92604.3	254.302	67351.5	167.727	776978	2152.87	4.01581e-08	8.3903		3.37589		92918.3	254.325	67517.5	167.761	799656	2152.87		8.60601							0.716752	0.000979319
NIST SRM 987 60ppb	2025-02-18 11:43:33	190240	563.699	138391	355.571	1.55246e+06	4302.57	3.95015e-08	8.16052				191570	563.709	139094	355.587	1.64571e+06	4302.58		8.59064		average & std of NIST SRM 987 30ppb					0.716595	0.000921045
NIST SRM 987 60ppb	2025-02-18 11:53:14	190671	681.044	139055	428.221	1.55782e+06	5103.7	3.8548e-08	8.17023				192007	681.052	139765	428.234	1.65174e+06	5103.7		8.60252		831157	9.4049	8.62662	0.252918		0.7179	0.000959924
NIST SRM 987 15ppb	2025-02-18 12:12:38	45344.1	238.19	33063	153.335	386082	1905.57	3.8651e-08	8.51449				45419.3	238.214	33103	153.372	391600	1905.57		8.6219							0.717869	0.00127693
NIST SRM 987 30ppb	2025-02-18 12:22:18	95074.5	238.412	69243.5	163.921	795398	3155.63	4.32245e-08	8.36605				95405.6	238.436	69418.9	163.956	819181	3155.63		8.5863		average & std of NIST SRM 987 60ppb					0.718219	0.00108353
NIST SRM 987 60ppb	2025-02-18 12:32:00	192666	959.521	140790	393.883	1.57618e+06	4959.42	3.72108e-08	8.18091				194030	959.527	141517	393.898	1.67239e+06	4959.42		8.61925		1.66098e+06	8.76587	8.63202	0.281686		0.718072	0.00101584
Plate Bias -65 V
NIST SRM 987 15ppb	2025-02-18 13:01:17	49343.5	241.555	35923	179.513	418967	2579.37	4.30229e-08	8.49082				49432.5	241.579	35970.1	179.545	425473	2579.37		8.60715							0.717073	0.0012349
NIST SRM 987 15ppb	2025-02-18 13:10:58	49804.4	255.163	36297.7	168.873	423295	2647.62	4.00003e-08	8.49916				49895.1	255.186	36345.8	168.907	429938	2647.63		8.61684							0.717391	0.0010934
NIST SRM 987 30ppb	2025-02-18 13:20:41	104524	257.532	75907.5	336.633	874020	2334.85	3.99599e-08	8.3619				104924	257.554	76118.4	336.65	902822	2334.85		8.60449							0.716853	0.00103327
NIST SRM 987 30ppb	2025-02-18 13:30:22	104562	482.589	76372.9	266.894	877098	3054.69	3.58768e-08	8.38828				104963	482.601	76586.4	266.915	906106	3054.69		8.63263							0.718086	0.000931928
NIST SRM 987 60ppb	2025-02-18 13:40:03	216789	689.39	157697	712.312	1.76248e+06	6145.92	3.70717e-08	8.1299				218518	689.399	158610	712.32	1.88365e+06	6145.92		8.62011							0.71646	0.00084581
NIST SRM 987 60ppb	2025-02-18 13:49:46	216335	657.752	157201	861.341	1.75965e+06	5421.48	3.68325e-08	8.13391				218057	657.761	158109	861.348	1.88043e+06	5421.49		8.62355							0.71608	0.000940633
NIST SRM 987 15ppb	2025-02-18 14:09:09	51133.7	260.934	37073.2	249.412	434897	2105.22	3.7145e-08	8.50509				51229.3	260.955	37123.4	249.434	441911	2105.22		8.62615							0.715761	0.00114948
NIST SRM 987 30ppb	2025-02-18 14:18:51	106425	389.593	77534.6	178.253	891248	2272.25	3.73471e-08	8.37441				106840	389.608	77754.7	178.285	921216	2272.26		8.62237							0.716514	0.00108008
NIST SRM 987 60ppb	2025-02-18 14:28:32	215798	835.315	157464	465.531	1.76073e+06	5412.67	3.49318e-08	8.15914				217511	835.321	158374	465.543	1.88165e+06	5412.67		8.65083							0.715829	0.000916039
Plate Bias -55 V
NIST SRM 987 15ppb	2025-02-18 14:57:52	52564.7	246.166	38132.9	234.841	446354	2145.75	4.01794e-08	8.49151				52665.7	246.189	38186	234.866	453746	2145.75		8.61559							0.716197	0.001166
NIST SRM 987 15ppb	2025-02-18 15:07:33	53385.8	282.043	38766.9	234.401	453184	2338.34	4.0344e-08	8.48885				53490.1	282.063	38821.9	234.425	460807	2338.34		8.61481							0.716856	0.00122065
NIST SRM 987 30ppb	2025-02-18 15:17:15	110078	288.333	80050.7	204.455	920763	2863.05	3.75352e-08	8.36468				110522	288.352	80285.3	204.483	952784	2863.05		8.6208							0.715845	0.00103093
NIST SRM 987 30ppb	2025-02-18 15:26:57	109541	384.42	79748.3	178.202	917067	2436.57	3.66529e-08	8.37191				109981	384.434	79981.1	178.234	948827	2436.57		8.62721							0.716017	0.000939773
NIST SRM 987 60ppb	2025-02-18 15:36:38	222895	836.652	162354	494.006	1.81389e+06	5788.38	3.54443e-08	8.13788				224724	836.659	163322	494.017	1.9425e+06	5788.38		8.64396							0.714845	0.0008994
NIST SRM 987 60ppb	2025-02-18 15:46:19	223624	682.841	162591	921.78	1.81732e+06	5788.46	3.61856e-08	8.12668				225464	682.85	163561	921.787	1.94643e+06	5788.46		8.63299							0.716071	0.0009853
NIST SRM 987 15ppb	2025-02-18 16:05:44	53317.6	257.034	38771.1	194.6	452304	2948.56	4.20587e-08	8.48321				53421.5	257.056	38826	194.629	459896	2948.56		8.60882							0.716407	0.00118283
NIST SRM 987 30ppb	2025-02-18 16:15:25	110873	469.524	80837.2	203.049	931015	2725.68	3.25496e-08	8.39715				111323	469.537	81076.4	203.077	963766	2725.68		8.65736							0.715623	0.000997356
NIST SRM 987 60ppb	2025-02-18 16:25:06	226068	745.51	164611	547.225	1.83018e+06	9093.58	3.81512e-08	8.09569				227949	745.518	165606	547.235	1.96119e+06	9093.58		8.60362							0.716336	0.000868466
Plate Bias -45 V
NIST SRM 987 15ppb	2025-02-18 16:54:26	51056.9	305.852	37128.9	208.945	435264	2891.85	3.1095e-08	8.52508				51152.3	305.871	37179.2	208.972	442291	2891.85		8.64656							0.714001	0.00126995
NIST SRM 987 15ppb	2025-02-18 17:04:09	51717.7	224.483	37541.6	157.642	439932	2694.01	3.63295e-08	8.5064				51815.5	224.508	37593.1	157.679	447111	2694.01		8.6289							0.714353	0.00120138
NIST SRM 987 30ppb	2025-02-18 17:13:50	105891	607.395	77134.3	429.543	888503	5071.56	3.50577e-08	8.39071				106302	607.404	77352.1	429.556	918283	5071.57		8.63842							0.716207	0.00101475
NIST SRM 987 30ppb	2025-02-18 17:23:31	103190	386.531	75015.7	306.413	867160	2976.02	3.39781e-08	8.40356				103580	386.546	75221.6	306.432	895504	2976.02		8.64555							0.715772	0.000987649
NIST SRM 987 60ppb	2025-02-18 17:33:12	210161	715.386	153021	479.794	1.71438e+06	7105.25	3.60019e-08	8.15749				211785	715.394	153881	479.805	1.82882e+06	7105.25		8.63527							0.715099	0.000959031
NIST SRM 987 60ppb	2025-02-18 17:42:54	211771	999.592	154349	603.743	1.72678e+06	7612.6	3.60092e-08	8.15399				213420	999.598	155224	603.753	1.84293e+06	7612.6		8.63522							0.715745	0.000888624
NIST SRM 987 15ppb	2025-02-18 18:02:17	50117.7	345.955	36457.9	221.099	427089	2646.98	3.27154e-08	8.52173				50209.5	345.972	36506.5	221.125	433853	2646.98		8.64085							0.715372	0.00110443
NIST SRM 987 30ppb	2025-02-18 18:11:59	105060	282.709	76356	228.374	878705	4410.15	3.94547e-08	8.36385				105464	282.73	76569.4	228.399	907821	4410.15		8.60786							0.715801	0.00100749
NIST SRM 987 60ppb	2025-02-18 18:21:40	212222	950.31	154409	635.096	1.72823e+06	9243	3.67778e-08	8.14346				213879	950.316	155284	635.105	1.84458e+06	9243.01		8.62441							0.714972	0.000855292
Plate Bias -35 V
NIST SRM 987 15ppb	2025-02-18 18:50:58	40253	195.602	29237.5	136.928	344352	1654.21	2.80328e-08	8.55468				40312.2	195.631	29268.7	136.97	348735	1654.22		8.65085							0.714341	0.00120571
NIST SRM 987 15ppb	2025-02-18 19:00:39	41016	226.048	29859	116.038	351824	1492.53	1.88512e-08	8.57773				41077.5	226.073	29891.6	116.088	356401	1492.53		8.6763							0.714247	0.00109373
NIST SRM 987 30ppb	2025-02-18 19:10:21	85553.9	210.466	62101.2	297.27	723505	1624.14	3.10934e-08	8.45671				85821.9	210.493	62242.3	297.29	743129	1624.15		8.65897							0.714706	0.00111361
NIST SRM 987 30ppb	2025-02-18 19:20:03	85035.6	232.703	61785.1	160.927	719542	2522.98	3.03647e-08	8.46165				85300.4	232.728	61924.8	160.962	738949	2522.99		8.6629							0.713629	0.00112983
NIST SRM 987 60ppb	2025-02-18 19:29:44	173142	528.75	125824	378.087	1.42926e+06	6107.46	3.4256e-08	8.25483				174243	528.761	126404	378.102	1.50793e+06	6107.47		8.65413							0.713025	0.000953961
NIST SRM 987 60ppb	2025-02-18 19:39:25	174183	539.006	126666	386.753	1.43842e+06	4478.78	3.37427e-08	8.25807				175298	539.016	127254	386.768	1.51812e+06	4478.78		8.66025							0.713741	0.000846824
NIST SRM 987 15ppb	2025-02-18 19:58:49	41154.8	218.143	29993.1	142.941	353189	1761.8	1.72052e-08	8.58197				41216.7	218.169	30025.9	142.981	357802	1761.8		8.68098							0.714717	0.00122346
NIST SRM 987 30ppb	2025-02-18 20:08:31	86532.3	212.698	62785.6	188.815	728654	3969.03	3.73697e-08	8.4206				86806.5	212.725	62929.9	188.845	748563	3969.03		8.62335							0.714124	0.00111814
NIST SRM 987 60ppb	2025-02-18 20:18:12	174801	587.403	126866	687.075	1.44695e+06	4560.75	3.1766e-08	8.27769				175924	587.413	127457	687.083	1.52763e+06	4560.75		8.68349							0.712931	0.000989043
																						covariance used to calculate τ uncertainty following Iso et al. (1995)	9.24485		0.277713
					slope of the linear intercept of M1 (88Sr16O τ = 0) vs 88Sr16O τ = 0 / 86Sr16O τ = 0	m =	-2.77554e-07									slope of the linear intercept of M1 (88Sr16O τ = 0) vs 88Sr16O/ 86Sr16O τ corrected	m =	9.67458e-10
					intercept of the linear intercept of M1 (88Sr16O τ = 0) vs 88Sr16O τ = 0 / 86Sr16O τ = 0	c =	8.62832									intercept of the linear intercept of M1 (88Sr16O τ = 0) vs 88Sr16O/ 86Sr16O τ corrected	c =	8.62828
Extract 2 Experiment											3.665e-08
Extract 2 -240 V
NIST SRM 987 15ppb	2025-02-18 20:47:31	52149	244.505	37863.2	181.491	443503	2095.34	3.23196e-08	8.50452		Session Specific τ		52248.9	244.513	37915.9	181.502	450831	2095.34		8.62852		average & std of NIST SRM 987 15ppb					0.714674	0.0013957
NIST SRM 987 15ppb	2025-02-18 20:57:13	52282.4	334.199	38052.9	154.493	444360	1979.84	3.38224e-08	8.49923		(ns)		52382.8	334.205	38106.1	154.506	451717	1979.84		8.62338		481447	5.73281	8.61548	0.146126		0.715814	0.00134044
NIST SRM 987 30ppb	2025-02-18 21:06:55	108924	215.548	79103.3	257.633	907536	5041.58	4.07874e-08	8.33183		36.65		109361	215.558	79333.3	257.641	938761	5041.58		8.58408							0.716615	0.00105818
NIST SRM 987 30ppb	2025-02-18 21:16:36	108134	289.163	78734.3	215.483	904959	3479.55	3.55253e-08	8.36888		2.00552		108564	289.17	78962.1	215.492	936003	3479.55		8.62167							0.716587	0.00105426
NIST SRM 987 60ppb	2025-02-18 21:26:17	219107	607.253	159649	439.893	1.77998e+06	5619.96	3.61458e-08	8.1238				220881	607.257	160588	439.898	1.90421e+06	5619.96		8.62096		average & std of NIST SRM 987 30ppb					0.716565	0.0010637
NIST SRM 987 60ppb	2025-02-18 21:36:00	219888	874.226	160212	451.261	1.78851e+06	5196.9	3.52427e-08	8.13375				221674	874.228	161158	451.265	1.91397e+06	5196.9		8.63416		991854	5.48131	8.61028	0.290806		0.715363	0.000929194
NIST SRM 987 15ppb	2025-02-18 21:55:22	52369.9	239.308	38127.4	172.846	445085	2277.38	3.38724e-08	8.49887				52470.6	239.316	38180.8	172.857	452465	2277.38		8.62322							0.716559	0.00125769
NIST SRM 987 30ppb	2025-02-18 22:05:04	109941	187.139	79818.9	303.299	917310	5588.63	3.86585e-08	8.34366				110386	187.15	80053.1	303.306	949222	5588.63		8.59914		average & std of NIST SRM 987 60ppb					0.715884	0.00102539
NIST SRM 987 60ppb	2025-02-18 22:14:45	220693	566.268	160299	818.736	1.78633e+06	11936	3.81956e-08	8.09418				222493	566.272	161246	818.738	1.91147e+06	11936		8.59116		1.92662e+06	5.18917	8.61701	0.215201		0.715758	0.000934013
Extract 2 -220 V
NIST SRM 987 15ppb	2025-02-18 22:44:04	54184.3	268.815	39382.3	196.734	459322	2335.69	3.90711e-08	8.47702				54292.2	268.822	39439.2	196.745	467186	2335.69		8.60504							0.716627	0.00119544
NIST SRM 987 15ppb	2025-02-18 22:53:46	54701.8	213.957	39763.3	170.77	462648	3123.34	4.42918e-08	8.45764				54811.7	213.966	39821.4	170.782	470628	3123.34		8.58627							0.717299	0.0010352
NIST SRM 987 30ppb	2025-02-18 23:03:28	114350	200.825	83152.5	138.428	954832	2262.68	3.6252e-08	8.35011				114831	200.835	83406.7	138.443	989457	2262.68		8.61665							0.716067	0.00104683
NIST SRM 987 30ppb	2025-02-18 23:13:10	113086	315.745	82257.7	504.982	946769	2882.89	3.35052e-08	8.37214				113556	315.751	82506.5	504.986	980802	2882.89		8.63714							0.717416	0.00118021
NIST SRM 987 60ppb	2025-02-18 23:22:51	228561	647.58	166321	707.144	1.85165e+06	11857.6	3.63392e-08	8.10135				230491	647.583	167341	707.146	1.98646e+06	11857.6		8.61835							0.715747	0.00100785
NIST SRM 987 60ppb	2025-02-18 23:32:33	229160	678.979	166558	1005.09	1.85952e+06	5381.32	3.52545e-08	8.11453				231101	678.982	167581	1005.09	1.99552e+06	5381.32		8.63486							0.715775	0.000976763
NIST SRM 987 15ppb	2025-02-18 23:51:56	54689.8	255	39783	175.375	464237	2255.19	3.53927e-08	8.48856				54799.6	255.008	39841.1	175.386	472273	2255.19		8.61817							0.716711	0.00117974
NIST SRM 987 30ppb	2025-02-19 00:01:38	114611	250.289	83307.9	187.989	955195	3759.95	3.84198e-08	8.33424				115094	250.297	83563	188	989848	3759.95		8.60032							0.715933	0.00102358
NIST SRM 987 60ppb	2025-02-19 00:11:20	230859	611.8	167826	780.296	1.86439e+06	12221.1	3.7885e-08	8.07588				232829	611.804	168865	780.298	2.00113e+06	12221.1		8.59484							0.716155	0.000856485
Extract 2 -200 V
NIST SRM 987 15ppb	2025-02-19 00:40:38	56473.1	288.544	41090.1	201.15	479003	2657.91	3.61102e-08	8.48196				56590.2	288.551	41152	201.16	487562	2657.91		8.61566							0.716757	0.00130509
NIST SRM 987 15ppb	2025-02-19 00:50:19	56995.9	248.137	41452.8	176.64	483972	2188.72	3.31908e-08	8.49135				57115.2	248.145	41515.9	176.651	492712	2188.72		8.62663							0.716185	0.00118345
NIST SRM 987 30ppb	2025-02-19 01:00:02	119404	274.973	86689.7	508.953	995256	2190.57	3.67432e-08	8.33523				119928	274.98	86966	508.957	1.03293e+06	2190.57		8.61292							0.716645	0.00106485
NIST SRM 987 30ppb	2025-02-19 01:09:43	118021	518.759	85932.9	271.808	986836	3273.35	3.35571e-08	8.36152				118534	518.763	86204.4	271.816	1.02387e+06	3273.35		8.63776							0.715346	0.000991382
NIST SRM 987 60ppb	2025-02-19 01:19:24	238901	691.291	173886	552.258	1.92653e+06	10329.8	3.74634e-08	8.06414				241011	691.294	175001	552.261	2.07289e+06	10329.8		8.60082							0.716103	0.000940145
NIST SRM 987 60ppb	2025-02-19 01:29:06	239144	714.943	174052	982.899	1.93267e+06	13579.4	3.61552e-08	8.08164				241258	714.945	175169	982.901	2.08001e+06	13579.4		8.62149							0.716031	0.00104818
NIST SRM 987 15ppb	2025-02-19 01:48:28	56819.8	263.763	41257.9	187.961	481260	2715.24	3.92221e-08	8.46994				56938.4	263.77	41320.4	187.972	489901	2715.24		8.60406							0.715328	0.00116128
NIST SRM 987 30ppb	2025-02-19 01:58:10	119619	256.49	86867.5	439.516	997829	2598.93	3.57916e-08	8.34174				120146	256.497	87145	439.521	1.03571e+06	2598.93		8.62042							0.716269	0.00104362
NIST SRM 987 60ppb	2025-02-19 02:07:52	240211	717.321	174717	843.797	1.93909e+06	13066.7	3.6658e-08	8.07245				242345	717.324	175843	843.799	2.08744e+06	13066.7		8.61353							0.715653	0.00105262
Extract 2 -180 V
NIST SRM 987 15ppb	2025-02-19 02:37:09	58656.5	296.216	42670.4	215.631	496931	2836.4	3.74697e-08	8.47189				58782.9	296.223	42737.3	215.641	506149	2836.4		8.6105							0.716534	0.00102589
NIST SRM 987 15ppb	2025-02-19 02:46:50	59344.4	245.736	43135.6	182.357	503437	2315.8	3.40061e-08	8.48331				59473.8	245.744	43203.9	182.368	512900	2315.8		8.62398							0.715857	0.00119491
NIST SRM 987 30ppb	2025-02-19 02:56:31	124125	243.627	90295	148.405	1.03454e+06	2749.44	3.5422e-08	8.33465				124692	243.635	90594.8	148.419	1.07531e+06	2749.44		8.62371							0.715984	0.000985926
NIST SRM 987 30ppb	2025-02-19 03:06:14	122686	342.331	89172.3	521.696	1.02517e+06	3116.68	3.3002e-08	8.35606				123240	342.337	89464.7	521.7	1.06519e+06	3116.68		8.64324							0.716169	0.00106491
NIST SRM 987 60ppb	2025-02-19 03:15:55	248138	698.832	180384	817.937	1.99614e+06	12914.8	3.74494e-08	8.0445				250415	698.835	181584	817.939	2.15371e+06	12914.8		8.60055							0.715644	0.00103904
NIST SRM 987 60ppb	2025-02-19 03:25:38	248121	1086.16	181224	478.959	2.00799e+06	5580	3.40693e-08	8.0928				250398	1086.16	182436	478.963	2.16751e+06	5580		8.65624							0.716008	0.000993677
NIST SRM 987 15ppb	2025-02-19 03:45:00	59106.7	274.896	42979.5	198.34	500212	2702.66	3.95936e-08	8.46286				59235	274.903	43047.3	198.35	509553	2702.66		8.60223							0.716542	0.00122599
NIST SRM 987 30ppb	2025-02-19 03:54:42	124725	298.39	90529.8	511.679	1.03755e+06	2838.13	3.734e-08	8.31868				125298	298.397	90831.2	511.683	1.07857e+06	2838.13		8.60799							0.716794	0.000990956
NIST SRM 987 60ppb	2025-02-19 04:04:24	250021	676.506	182037	734.251	2.01471e+06	12231.9	3.62151e-08	8.05814				252334	676.509	183259	734.253	2.17533e+06	12231.9		8.62086							0.715979	0.000951139
Extract 2 -160 V
NIST SRM 987 15ppb	2025-02-19 04:33:43	60928.9	302.553	44316.2	226.416	516209	3733.71	3.59582e-08	8.47233				61065.2	302.56	44388.3	226.425	526164	3733.71		8.61643							0.716279	0.0011059
NIST SRM 987 15ppb	2025-02-19 04:43:24	61412.6	290.586	44667.2	212.645	521394	2501.8	3.11453e-08	8.49002				61551.1	290.593	44740.4	212.655	531551	2501.8		8.63593							0.715614	0.00119066
NIST SRM 987 30ppb	2025-02-19 04:53:07	126534	382.674	91742	578.867	1.05164e+06	3412.57	3.77827e-08	8.31113				127124	382.679	92051.5	578.871	1.0938e+06	3412.58		8.60422							0.716093	0.00126187
NIST SRM 987 30ppb	2025-02-19 05:02:49	125276	395.823	90913.7	613.913	1.04495e+06	3519.12	3.42443e-08	8.34121				125854	395.828	91217.6	613.916	1.08657e+06	3519.12		8.63356							0.715623	0.00121631
NIST SRM 987 60ppb	2025-02-19 05:12:31	254439	706.59	184996	1057.99	2.05014e+06	6232.48	3.56288e-08	8.05752				256834	706.593	186259	1057.99	2.2167e+06	6232.48		8.63089							0.715894	0.00120841
NIST SRM 987 60ppb	2025-02-19 05:22:12	254482	778.04	185092	835.317	2.04182e+06	13658.7	3.79665e-08	8.02344				256878	778.042	186356	835.319	2.20698e+06	13658.7		8.59153							0.716235	0.00117318
NIST SRM 987 15ppb	2025-02-19 05:41:36	61429.8	309.568	44671.9	225.758	520131	3274.98	3.70123e-08	8.46708				61568.4	309.574	44745.2	225.767	530239	3274.98		8.61219							0.715997	0.00117516
NIST SRM 987 30ppb	2025-02-19 05:51:18	127548	256.38	92476.3	435.753	1.05464e+06	7234.15	4.29724e-08	8.2686				128147	256.388	92790.8	435.758	1.09704e+06	7234.15		8.56085							0.716339	0.00113519
NIST SRM 987 60ppb	2025-02-19 06:00:59	255900	782.419	186357	662.004	2.05982e+06	12203.6	3.59835e-08	8.04933				258322	782.422	187639	662.007	2.22802e+06	12203.6		8.62496							0.715467	0.00108901
																						covariance used to calculate τ uncertainty following Iso et al. (1995)	5.46776		0.217378
					slope of the linear intercept of M1 (88Sr16O τ = 0) vs 88Sr16O τ = 0 / 86Sr16O τ = 0	m =	-2.77617e-07									slope of the linear intercept of M1 (88Sr16O τ = 0) vs 88Sr16O/ 86Sr16O τ corrected	m =	1.59741e-09
					intercept of the linear intercept of M1 (88Sr16O τ = 0) vs 88Sr16O τ = 0 / 86Sr16O τ = 0	c =	8.61365									intercept of the linear intercept of M1 (88Sr16O τ = 0) vs 88Sr16O/ 86Sr16O τ corrected	c =	8.61355
